# Supplementary material for: Intensive pasture management alters the composition and structure of plant-pollinator interactions in Sibiu, Romania
Source: PeerJ. 2024 Feb 29;12:e16900. doi: 10.7717/peerj.16900 (PMC10909354; doi:10.7717/peerj.16900)
Supplement: Supplemental Information 1 — Sampling completeness is calculated as the percent difference between observed richness in the site and the estimated asymptotic richness of the site. [file peerj-12-16900-s001.xlsx]

## Sheet: Tabelle1
	Hay meadow
	Plants		Pollinators		Interactions
	Observed	Estimated	Observed	Estimated	Observed	Estimated
Number of species	53	69	49	79.6	148	250.78
% Sampling completness	76.8%		61.56%		59.02%
	Pasture
	Plants		Pollinators		Interactions
	Observed	Estimated	Observed	Estimated	Observed	Estimated
Number of species	55	67.96	27	45.2	84	123.14
% Sampling completness	0.8093		0.5974		0.6822
