# Supplementary material for: Intensive pasture management alters the composition and structure of plant-pollinator interactions in Sibiu, Romania
Source: PeerJ. 2024 Feb 29;12:e16900. doi: 10.7717/peerj.16900 (PMC10909354; doi:10.7717/peerj.16900)
Supplement: Supplemental Information 5 — The identity of flowering plant species present at each site and the percent cover of their flowers or inflorescences in the 30m by 2m transects. Site = Sampling location; Type = management type; Transect = section number; Date = Sampling date; Visit = first, second or third visit; Family = plant family; Species = plant species following Flora Europea; %corr = relative flower cover for each species (+ and r categories from the Braun-Blanche scale were adjusted to numerical values). [file peerj-12-16900-s005.xlsx]

## Sheet: SB_Plants
Site	Type	Transect	Date	Visit	Family	Species	% corr
Sibiu Gusterita	Natural	SB1	08.07.2021	II	Rubiaceae	Asperula.cynanchica	0.1
Sibiu Gusterita	Natural	SB1	08.07.2021	III	Rubiaceae	Asperula.cynanchica	0.1
Sibiu Gusterita	Natural	SB1	29.06.2021	I	Fabaceae	Astragalus.cicer	3
Sibiu Gusterita	Natural	SB1	08.07.2021	II	Fabaceae	Astragalus.cicer	0.4
Sibiu Gusterita	Natural	SB1	08.07.2021	III	Fabaceae	Astragalus.cicer	0.4
Sibiu Gusterita	Natural	SB1	29.06.2021	I	Fabaceae	Astragalus.onobrychis	12
Sibiu Gusterita	Natural	SB1	08.07.2021	II	Fabaceae	Astragalus.onobrychis	0.8
Sibiu Gusterita	Natural	SB1	08.07.2021	III	Fabaceae	Astragalus.onobrychis	0.8
Sibiu Gusterita	Natural	SB1	08.07.2021	II	Apiaceae	Bupleurum.falcatum	0.2
Sibiu Gusterita	Natural	SB1	08.07.2021	III	Apiaceae	Bupleurum.falcatum	0.2
Sibiu Gusterita	Natural	SB1	08.07.2021	II	Asteraceae	Cichorium.intybus	0
Sibiu Gusterita	Natural	SB1	08.07.2021	III	Asteraceae	Cichorium.intybus	0
Sibiu Gusterita	Natural	SB1	08.07.2021	II	Lamiaceae	Clinopodium.vulgare	0.2
Sibiu Gusterita	Natural	SB1	08.07.2021	III	Lamiaceae	Clinopodium.vulgare	0.2
Sibiu Gusterita	Natural	SB1	29.06.2021	I	Convolvulaceae	Convolvulus.arvensis	0.2
Sibiu Gusterita	Natural	SB1	08.07.2021	II	Convolvulaceae	Convolvulus.arvensis	0.15
Sibiu Gusterita	Natural	SB1	08.07.2021	III	Convolvulaceae	Convolvulus.arvensis	0.15
Sibiu Gusterita	Natural	SB1	29.06.2021	I	Fabaceae	Coronilla.varia	1
Sibiu Gusterita	Natural	SB1	08.07.2021	II	Fabaceae	Coronilla.varia	0.9
Sibiu Gusterita	Natural	SB1	08.07.2021	III	Fabaceae	Coronilla.varia	0.9
Sibiu Gusterita	Natural	SB1	29.06.2021	I	Fabaceae	Dorycnium.herbaceum	20
Sibiu Gusterita	Natural	SB1	08.07.2021	II	Fabaceae	Dorycnium.herbaceum	27
Sibiu Gusterita	Natural	SB1	08.07.2021	III	Fabaceae	Dorycnium.herbaceum	27
Sibiu Gusterita	Natural	SB1	29.06.2021	I	Asteraceae	Erigeron.annuus	0.001
Sibiu Gusterita	Natural	SB1	08.07.2021	II	Asteraceae	Erigeron.annuus	0.001
Sibiu Gusterita	Natural	SB1	08.07.2021	III	Asteraceae	Erigeron.annuus	0.001
Sibiu Gusterita	Natural	SB1	29.06.2021	I	Rubiaceae	Galium.mollugo.album	0.1
Sibiu Gusterita	Natural	SB1	08.07.2021	II	Rubiaceae	Galium.mollugo.album	0.2
Sibiu Gusterita	Natural	SB1	08.07.2021	III	Rubiaceae	Galium.mollugo.album	0.2
Sibiu Gusterita	Natural	SB1	29.06.2021	I	Rubiaceae	Galium.verum	0.4
Sibiu Gusterita	Natural	SB1	08.07.2021	II	Rubiaceae	Galium.verum	0.6
Sibiu Gusterita	Natural	SB1	08.07.2021	III	Rubiaceae	Galium.verum	0.6
Sibiu Gusterita	Natural	SB1	29.06.2021	I	Dipsacaceae	Knautia.arvensis	0.2
Sibiu Gusterita	Natural	SB1	08.07.2021	II	Dipsacaceae	Knautia.arvensis	0.2
Sibiu Gusterita	Natural	SB1	08.07.2021	III	Dipsacaceae	Knautia.arvensis	0.2
Sibiu Gusterita	Natural	SB1	08.07.2021	II	Fabaceae	Lathyrus.tuberosus	0.001
Sibiu Gusterita	Natural	SB1	08.07.2021	III	Fabaceae	Lathyrus.tuberosus	0.001
Sibiu Gusterita	Natural	SB1	29.06.2021	I	Linaceae	Linum.catharticum	0.1
Sibiu Gusterita	Natural	SB1	08.07.2021	II	Linaceae	Linum.catharticum	0
Sibiu Gusterita	Natural	SB1	08.07.2021	III	Linaceae	Linum.catharticum	0
Sibiu Gusterita	Natural	SB1	29.06.2021	I	Fabaceae	Lotus.corniculatus	0.8
Sibiu Gusterita	Natural	SB1	08.07.2021	II	Fabaceae	Lotus.corniculatus	0.2
Sibiu Gusterita	Natural	SB1	08.07.2021	III	Fabaceae	Lotus.corniculatus	0.2
Sibiu Gusterita	Natural	SB1	29.06.2021	I	Fabaceae	Medicago.falcata	2
Sibiu Gusterita	Natural	SB1	08.07.2021	II	Fabaceae	Medicago.falcata	10
Sibiu Gusterita	Natural	SB1	08.07.2021	III	Fabaceae	Medicago.falcata	10
Sibiu Gusterita	Natural	SB1	29.06.2021	I	Fabaceae	Medicago.lupulina	0.1
Sibiu Gusterita	Natural	SB1	08.07.2021	II	Fabaceae	Medicago.lupulina	0.001
Sibiu Gusterita	Natural	SB1	08.07.2021	III	Fabaceae	Medicago.lupulina	0.001
Sibiu Gusterita	Natural	SB1	29.06.2021	I	Fabaceae	Onobrychis.viciifolia	4
Sibiu Gusterita	Natural	SB1	08.07.2021	II	Fabaceae	Onobrychis.viciifolia	0.8
Sibiu Gusterita	Natural	SB1	08.07.2021	III	Fabaceae	Onobrychis.viciifolia	0.8
Sibiu Gusterita	Natural	SB1	29.06.2021	I	Orobanchaceae	Rhinanthus.major	0.001
Sibiu Gusterita	Natural	SB1	08.07.2021	II	Orobanchaceae	Rhinanthus.major	0
Sibiu Gusterita	Natural	SB1	08.07.2021	III	Orobanchaceae	Rhinanthus.major	0
Sibiu Gusterita	Natural	SB1	08.07.2021	II	Lamiaceae	Salvia.verticillata	0.001
Sibiu Gusterita	Natural	SB1	08.07.2021	III	Lamiaceae	Salvia.verticillata	0.001
Sibiu Gusterita	Natural	SB1	08.07.2021	II	Lamiaceae	Teucrium.chamaedrys	0.001
Sibiu Gusterita	Natural	SB1	08.07.2021	III	Lamiaceae	Teucrium.chamaedrys	0.001
Sibiu Gusterita	Natural	SB1	29.06.2021	I	Lamiaceae	Thymus.sp	0.3
Sibiu Gusterita	Natural	SB1	08.07.2021	II	Lamiaceae	Thymus.sp	0
Sibiu Gusterita	Natural	SB1	08.07.2021	III	Lamiaceae	Thymus.sp	0
Sibiu Gusterita	Natural	SB1	29.06.2021	I	Fabaceae	Trifolium.pratense	0.6
Sibiu Gusterita	Natural	SB1	08.07.2021	II	Fabaceae	Trifolium.pratense	0.3
Sibiu Gusterita	Natural	SB1	08.07.2021	III	Fabaceae	Trifolium.pratense	0.3
Sibiu Gusterita	Natural	SB1	29.06.2021	I	Fabaceae	Vicia.cracca	0.6
Sibiu Gusterita	Natural	SB1	08.07.2021	II	Fabaceae	Vicia.cracca	0.8
Sibiu Gusterita	Natural	SB1	08.07.2021	III	Fabaceae	Vicia.cracca	0.8
Sibiu Gusterita	Pasture	SB10	29.06.2021	I	Asteraceae	Achillea.millefolium	1
Sibiu Gusterita	Pasture	SB10	07.07.2021	II	Asteraceae	Achillea.millefolium	1.5
Sibiu Gusterita	Pasture	SB10	07.07.2021	III	Asteraceae	Achillea.millefolium	1.5
Sibiu Gusterita	Pasture	SB10	29.06.2021	I	Rosaceae	Agrimonia.eupatoria	0.001
Sibiu Gusterita	Pasture	SB10	07.07.2021	II	Rosaceae	Agrimonia.eupatoria	0.001
Sibiu Gusterita	Pasture	SB10	07.07.2021	III	Rosaceae	Agrimonia.eupatoria	0.001
Sibiu Gusterita	Pasture	SB10	29.06.2021	I	Asteraceae	Bellis.perennis	0.2
Sibiu Gusterita	Pasture	SB10	07.07.2021	II	Asteraceae	Bellis.perennis	0.1
Sibiu Gusterita	Pasture	SB10	07.07.2021	III	Asteraceae	Bellis.perennis	0.1
Sibiu Gusterita	Pasture	SB10	29.06.2021	I	Asteraceae	Carduus.acanthoides	4
Sibiu Gusterita	Pasture	SB10	07.07.2021	II	Asteraceae	Carduus.acanthoides	0.7
Sibiu Gusterita	Pasture	SB10	07.07.2021	III	Asteraceae	Carduus.acanthoides	0.7
Sibiu Gusterita	Pasture	SB10	29.06.2021	I	Caryophyllaceae	Cerastium.holosteoides	0.1
Sibiu Gusterita	Pasture	SB10	07.07.2021	II	Caryophyllaceae	Cerastium.holosteoides	0.2
Sibiu Gusterita	Pasture	SB10	07.07.2021	III	Caryophyllaceae	Cerastium.holosteoides	0.2
Sibiu Gusterita	Pasture	SB10	07.07.2021	II	Apiaceae	Daucus.carota	0.2
Sibiu Gusterita	Pasture	SB10	07.07.2021	III	Apiaceae	Daucus.carota	0.2
Sibiu Gusterita	Pasture	SB10	07.07.2021	II	Apiaceae	Eryngium.campestre	0.3
Sibiu Gusterita	Pasture	SB10	07.07.2021	III	Apiaceae	Eryngium.campestre	0.3
Sibiu Gusterita	Pasture	SB10	29.06.2021	I	Rubiaceae	Galium.verum	0.3
Sibiu Gusterita	Pasture	SB10	07.07.2021	II	Rubiaceae	Galium.verum	0.8
Sibiu Gusterita	Pasture	SB10	07.07.2021	III	Rubiaceae	Galium.verum	0.8
Sibiu Gusterita	Pasture	SB10	29.06.2021	I	Asteraceae	Hieracium.pilosella	0.001
Sibiu Gusterita	Pasture	SB10	07.07.2021	II	Asteraceae	Hieracium.pilosella	0.1
Sibiu Gusterita	Pasture	SB10	07.07.2021	III	Asteraceae	Hieracium.pilosella	0.1
Sibiu Gusterita	Pasture	SB10	29.06.2021	I	Asteraceae	Hypochaeris.radicata	1
Sibiu Gusterita	Pasture	SB10	07.07.2021	II	Asteraceae	Hypochaeris.radicata	0.1
Sibiu Gusterita	Pasture	SB10	07.07.2021	III	Asteraceae	Hypochaeris.radicata	0.1
Sibiu Gusterita	Pasture	SB10	29.06.2021	I	Fabaceae	Lotus.corniculatus	0.8
Sibiu Gusterita	Pasture	SB10	07.07.2021	II	Fabaceae	Lotus.corniculatus	1
Sibiu Gusterita	Pasture	SB10	07.07.2021	III	Fabaceae	Lotus.corniculatus	1
Sibiu Gusterita	Pasture	SB10	29.06.2021	I	Plantaginaceae	Plantago.lanceolata	0.3
Sibiu Gusterita	Pasture	SB10	07.07.2021	II	Plantaginaceae	Plantago.lanceolata	0.2
Sibiu Gusterita	Pasture	SB10	07.07.2021	III	Plantaginaceae	Plantago.lanceolata	0.2
Sibiu Gusterita	Pasture	SB10	29.06.2021	I	Plantaginaceae	Plantago.media	0.1
Sibiu Gusterita	Pasture	SB10	07.07.2021	II	Plantaginaceae	Plantago.media	0.2
Sibiu Gusterita	Pasture	SB10	07.07.2021	III	Plantaginaceae	Plantago.media	0.2
Sibiu Gusterita	Pasture	SB10	07.07.2021	II	Lamiaceae	Prunella.vulgaris	0.2
Sibiu Gusterita	Pasture	SB10	07.07.2021	III	Lamiaceae	Prunella.vulgaris	0.2
Sibiu Gusterita	Pasture	SB10	07.07.2021	II	Ranunculaceae	Ranunculus.sp.	0.2
Sibiu Gusterita	Pasture	SB10	07.07.2021	III	Ranunculaceae	Ranunculus.sp.	0.2
Sibiu Gusterita	Pasture	SB10	29.06.2021	I	Lamiaceae	Salvia.pratensis	0.3
Sibiu Gusterita	Pasture	SB10	07.07.2021	II	Lamiaceae	Salvia.pratensis	0.001
Sibiu Gusterita	Pasture	SB10	07.07.2021	III	Lamiaceae	Salvia.pratensis	0.001
Sibiu Gusterita	Pasture	SB10	29.06.2021	I	Caryophyllaceae	Stellaria.graminea	0.2
Sibiu Gusterita	Pasture	SB10	07.07.2021	II	Caryophyllaceae	Stellaria.graminea	0.2
Sibiu Gusterita	Pasture	SB10	07.07.2021	III	Caryophyllaceae	Stellaria.graminea	0.2
Sibiu Gusterita	Pasture	SB10	29.06.2021	I	Fabaceae	Trifolium.campestre	1
Sibiu Gusterita	Pasture	SB10	07.07.2021	II	Fabaceae	Trifolium.campestre	0.4
Sibiu Gusterita	Pasture	SB10	07.07.2021	III	Fabaceae	Trifolium.campestre	0.4
Sibiu Gusterita	Pasture	SB10	29.06.2021	I	Fabaceae	Trifolium.pratense	1
Sibiu Gusterita	Pasture	SB10	07.07.2021	II	Fabaceae	Trifolium.pratense	0.7
Sibiu Gusterita	Pasture	SB10	07.07.2021	III	Fabaceae	Trifolium.pratense	0.7
Sibiu Gusterita	Pasture	SB10	29.06.2021	I	Fabaceae	Trifolium.repens	0.5
Sibiu Gusterita	Pasture	SB10	07.07.2021	II	Fabaceae	Trifolium.repens	0.2
Sibiu Gusterita	Pasture	SB10	07.07.2021	III	Fabaceae	Trifolium.repens	0.2
Sibiu Gusterita	Natural	SB2	29.06.2021	I	Asteraceae	Achillea.millefolium	0.2
Sibiu Gusterita	Natural	SB2	08.07.2021	II	Asteraceae	Achillea.millefolium	0.3
Sibiu Gusterita	Natural	SB2	2021-07-07	III	Asteraceae	Achillea.millefolium	0.3
Sibiu Gusterita	Natural	SB2	08.07.2021	II	Rosaceae	Agrimonia.eupatoria	0.001
Sibiu Gusterita	Natural	SB2	2021-07-07	III	Rosaceae	Agrimonia.eupatoria	0.001
Sibiu Gusterita	Natural	SB2	29.06.2021	I	Primulaceae	Anagallis.arvensis	0.1
Sibiu Gusterita	Natural	SB2	08.07.2021	II	Primulaceae	Anagallis.arvensis	0.2
Sibiu Gusterita	Natural	SB2	2021-07-07	III	Primulaceae	Anagallis.arvensis	0.2
Sibiu Gusterita	Natural	SB2	29.06.2021	I	Fabaceae	Astragalus.cicer	0.8
Sibiu Gusterita	Natural	SB2	08.07.2021	II	Fabaceae	Astragalus.cicer	0.3
Sibiu Gusterita	Natural	SB2	2021-07-07	III	Fabaceae	Astragalus.cicer	0.3
Sibiu Gusterita	Natural	SB2	29.06.2021	I	Fabaceae	Astragalus.onobrychis	4
Sibiu Gusterita	Natural	SB2	08.07.2021	II	Fabaceae	Astragalus.onobrychis	0.6
Sibiu Gusterita	Natural	SB2	2021-07-07	III	Fabaceae	Astragalus.onobrychis	0.6
Sibiu Gusterita	Natural	SB2	08.07.2021	II	Gentianaceae	Centaurium.erythraea	0.3
Sibiu Gusterita	Natural	SB2	2021-07-07	III	Gentianaceae	Centaurium.erythraea	0.3
Sibiu Gusterita	Natural	SB2	29.06.2021	I	Lamiaceae	Clinopodium.vulgare	0.001
Sibiu Gusterita	Natural	SB2	08.07.2021	II	Lamiaceae	Clinopodium.vulgare	0.1
Sibiu Gusterita	Natural	SB2	2021-07-07	III	Lamiaceae	Clinopodium.vulgare	0.1
Sibiu Gusterita	Natural	SB2	29.06.2021	I	Fabaceae	Coronilla.varia	1
Sibiu Gusterita	Natural	SB2	08.07.2021	II	Fabaceae	Coronilla.varia	0.4
Sibiu Gusterita	Natural	SB2	2021-07-07	III	Fabaceae	Coronilla.varia	0.4
Sibiu Gusterita	Natural	SB2	29.06.2021	I	Fabaceae	Dorycnium.herbaceum	30
Sibiu Gusterita	Natural	SB2	08.07.2021	II	Fabaceae	Dorycnium.herbaceum	35
Sibiu Gusterita	Natural	SB2	2021-07-07	III	Fabaceae	Dorycnium.herbaceum	35
Sibiu Gusterita	Natural	SB2	29.06.2021	I	Boraginaceae	Echium.vulgare	0.3
Sibiu Gusterita	Natural	SB2	08.07.2021	II	Boraginaceae	Echium.vulgare	0.3
Sibiu Gusterita	Natural	SB2	2021-07-07	III	Boraginaceae	Echium.vulgare	0.3
Sibiu Gusterita	Natural	SB2	29.06.2021	I	Apiaceae	Eryngium.campestre	0.001
Sibiu Gusterita	Natural	SB2	08.07.2021	II	Apiaceae	Eryngium.campestre	0.5
Sibiu Gusterita	Natural	SB2	2021-07-07	III	Apiaceae	Eryngium.campestre	0.5
Sibiu Gusterita	Natural	SB2	08.07.2021	II	Apiaceae	Falcaria.sioides	0.001
Sibiu Gusterita	Natural	SB2	2021-07-07	III	Apiaceae	Falcaria.sioides	0.001
Sibiu Gusterita	Natural	SB2	08.07.2021	II	Dipsacaceae	Knautia.arvensis	0.2
Sibiu Gusterita	Natural	SB2	2021-07-07	III	Dipsacaceae	Knautia.arvensis	0.2
Sibiu Gusterita	Natural	SB2	29.06.2021	I	Fabaceae	Lathyrus.tuberosus	2
Sibiu Gusterita	Natural	SB2	08.07.2021	II	Fabaceae	Lathyrus.tuberosus	2
Sibiu Gusterita	Natural	SB2	2021-07-07	III	Fabaceae	Lathyrus.tuberosus	2
Sibiu Gusterita	Natural	SB2	29.06.2021	I	Asteraceae	Leucanthemum.vulgare	0.5
Sibiu Gusterita	Natural	SB2	08.07.2021	II	Asteraceae	Leucanthemum.vulgare	0.3
Sibiu Gusterita	Natural	SB2	2021-07-07	III	Asteraceae	Leucanthemum.vulgare	0.3
Sibiu Gusterita	Natural	SB2	08.07.2021	II	Fabaceae	Lotus.corniculatus	0.2
Sibiu Gusterita	Natural	SB2	2021-07-07	III	Fabaceae	Lotus.corniculatus	0.2
Sibiu Gusterita	Natural	SB2	29.06.2021	I	Fabaceae	Medicago.falcata	1.5
Sibiu Gusterita	Natural	SB2	08.07.2021	II	Fabaceae	Medicago.falcata	2
Sibiu Gusterita	Natural	SB2	2021-07-07	III	Fabaceae	Medicago.falcata	2
Sibiu Gusterita	Natural	SB2	29.06.2021	I	Fabaceae	Medicago.lupulina	0.1
Sibiu Gusterita	Natural	SB2	08.07.2021	II	Fabaceae	Medicago.lupulina	0
Sibiu Gusterita	Natural	SB2	2021-07-07	III	Fabaceae	Medicago.lupulina	0
Sibiu Gusterita	Natural	SB2	29.06.2021	I	Fabaceae	Onobrychis.viciifolia	0.5
Sibiu Gusterita	Natural	SB2	08.07.2021	II	Fabaceae	Onobrychis.viciifolia	0.2
Sibiu Gusterita	Natural	SB2	2021-07-07	III	Fabaceae	Onobrychis.viciifolia	0.2
Sibiu Gusterita	Natural	SB2	08.07.2021	II	Fabaceae	Ononis.arvensis	0.3
Sibiu Gusterita	Natural	SB2	2021-07-07	III	Fabaceae	Ononis.arvensis	0.3
Sibiu Gusterita	Natural	SB2	08.07.2021	II	Plantaginaceae	Plantago.lanceolata	0.1
Sibiu Gusterita	Natural	SB2	2021-07-07	III	Plantaginaceae	Plantago.lanceolata	0.1
Sibiu Gusterita	Natural	SB2	29.06.2021	I	Plantaginaceae	Plantago.media	0.2
Sibiu Gusterita	Natural	SB2	08.07.2021	II	Plantaginaceae	Plantago.media	0
Sibiu Gusterita	Natural	SB2	2021-07-07	III	Plantaginaceae	Plantago.media	0
Sibiu Gusterita	Natural	SB2	29.06.2021	I	Orobanchaceae	Rhinanthus.major	30
Sibiu Gusterita	Natural	SB2	08.07.2021	II	Orobanchaceae	Rhinanthus.major	3
Sibiu Gusterita	Natural	SB2	2021-07-07	III	Orobanchaceae	Rhinanthus.major	3
Sibiu Gusterita	Natural	SB2	08.07.2021	II	Lamiaceae	Salvia.nemorosa	0.3
Sibiu Gusterita	Natural	SB2	2021-07-07	III	Lamiaceae	Salvia.nemorosa	0.3
Sibiu Gusterita	Natural	SB2	29.06.2021	I	Lamiaceae	Salvia.verticillata	0.001
Sibiu Gusterita	Natural	SB2	08.07.2021	II	Lamiaceae	Salvia.verticillata	0.2
Sibiu Gusterita	Natural	SB2	2021-07-07	III	Lamiaceae	Salvia.verticillata	0.2
Sibiu Gusterita	Natural	SB2	29.06.2021	I	Caprifoliaceae	Scabiosa.ochroleuca	0.2
Sibiu Gusterita	Natural	SB2	08.07.2021	II	Caprifoliaceae	Scabiosa.ochroleuca	0.3
Sibiu Gusterita	Natural	SB2	2021-07-07	III	Caprifoliaceae	Scabiosa.ochroleuca	0.3
Sibiu Gusterita	Natural	SB2	29.06.2021	I	Asteraceae	Senecio.jacobea	0.2
Sibiu Gusterita	Natural	SB2	08.07.2021	II	Asteraceae	Senecio.jacobea	0.5
Sibiu Gusterita	Natural	SB2	2021-07-07	III	Asteraceae	Senecio.jacobea	0.5
Sibiu Gusterita	Natural	SB2	08.07.2021	II	Lamiaceae	Stachys.annua	0.001
Sibiu Gusterita	Natural	SB2	2021-07-07	III	Lamiaceae	Stachys.annua	0
Sibiu Gusterita	Natural	SB2	29.06.2021	I	Lamiaceae	Teucrium.chamaedrys	0.2
Sibiu Gusterita	Natural	SB2	08.07.2021	II	Lamiaceae	Teucrium.chamaedrys	1.5
Sibiu Gusterita	Natural	SB2	2021-07-07	III	Lamiaceae	Teucrium.chamaedrys	12
Sibiu Gusterita	Natural	SB2	29.06.2021	I	Lamiaceae	Thymus.sp	1
Sibiu Gusterita	Natural	SB2	08.07.2021	II	Lamiaceae	Thymus.sp	0.3
Sibiu Gusterita	Natural	SB2	2021-07-07	III	Lamiaceae	Thymus.sp	0.3
Sibiu Gusterita	Natural	SB2	29.06.2021	I	Fabaceae	Trifolium.campestre	3
Sibiu Gusterita	Natural	SB2	08.07.2021	II	Fabaceae	Trifolium.campestre	0.2
Sibiu Gusterita	Natural	SB2	2021-07-07	III	Fabaceae	Trifolium.campestre	0.2
Sibiu Gusterita	Natural	SB2	29.06.2021	I	Fabaceae	Trifolium.pratense	0.3
Sibiu Gusterita	Natural	SB2	08.07.2021	II	Fabaceae	Trifolium.pratense	0.2
Sibiu Gusterita	Natural	SB2	2021-07-07	III	Fabaceae	Trifolium.pratense	0.2
Sibiu Gusterita	Natural	SB3	29.06.2021	I	Fabaceae	Astragalus.cicer	10
Sibiu Gusterita	Natural	SB3	08.07.2021	II	Fabaceae	Astragalus.cicer	1
Sibiu Gusterita	Natural	SB3	08.07.2021	III	Fabaceae	Astragalus.cicer	1
Sibiu Gusterita	Natural	SB3	29.06.2021	I	Fabaceae	Astragalus.onobrychis	0.5
Sibiu Gusterita	Natural	SB3	08.07.2021	II	Fabaceae	Astragalus.onobrychis	0.3
Sibiu Gusterita	Natural	SB3	08.07.2021	III	Fabaceae	Astragalus.onobrychis	0.3
Sibiu Gusterita	Natural	SB3	08.07.2021	II	Convolvulaceae	Convolvulus.arvensis	0.2
Sibiu Gusterita	Natural	SB3	08.07.2021	III	Convolvulaceae	Convolvulus.arvensis	0.2
Sibiu Gusterita	Natural	SB3	29.06.2021	I	Fabaceae	Coronilla.varia	11
Sibiu Gusterita	Natural	SB3	08.07.2021	II	Fabaceae	Coronilla.varia	20
Sibiu Gusterita	Natural	SB3	08.07.2021	III	Fabaceae	Coronilla.varia	20
Sibiu Gusterita	Natural	SB3	29.06.2021	I	Rosaceae	Erigeron.annuus	1
Sibiu Gusterita	Natural	SB3	08.07.2021	II	Rosaceae	Erigeron.annuus	0.6
Sibiu Gusterita	Natural	SB3	08.07.2021	III	Rosaceae	Erigeron.annuus	0.6
Sibiu Gusterita	Natural	SB3	29.06.2021	I	Rubiaceae	Galium.mollugo.album	1
Sibiu Gusterita	Natural	SB3	08.07.2021	II	Rubiaceae	Galium.mollugo.album	0.2
Sibiu Gusterita	Natural	SB3	08.07.2021	II	Rubiaceae	Galium.mollugo.album	0.5
Sibiu Gusterita	Natural	SB3	08.07.2021	III	Rubiaceae	Galium.mollugo.album	0.2
Sibiu Gusterita	Natural	SB3	08.07.2021	III	Rubiaceae	Galium.mollugo.album	0.5
Sibiu Gusterita	Natural	SB3	29.06.2021	I	Rubiaceae	Galium.verum	1
Sibiu Gusterita	Natural	SB3	08.07.2021	II	Rubiaceae	Galium.verum	0
Sibiu Gusterita	Natural	SB3	08.07.2021	III	Rubiaceae	Galium.verum	0.001
Sibiu Gusterita	Natural	SB3	29.06.2021	I	Dipsacaceae	Knautia.arvensis	0.001
Sibiu Gusterita	Natural	SB3	08.07.2021	II	Dipsacaceae	Knautia.arvensis	0
Sibiu Gusterita	Natural	SB3	08.07.2021	III	Dipsacaceae	Knautia.arvensis	0.001
Sibiu Gusterita	Natural	SB3	29.06.2021	I	Fabaceae	Lathyrus.tuberosus	0.001
Sibiu Gusterita	Natural	SB3	08.07.2021	II	Fabaceae	Lathyrus.tuberosus	0.2
Sibiu Gusterita	Natural	SB3	08.07.2021	III	Fabaceae	Lathyrus.tuberosus	0.2
Sibiu Gusterita	Natural	SB3	29.06.2021	I	Fabaceae	Lotus.corniculatus	0.6
Sibiu Gusterita	Natural	SB3	08.07.2021	II	Fabaceae	Lotus.corniculatus	3
Sibiu Gusterita	Natural	SB3	08.07.2021	III	Fabaceae	Lotus.corniculatus	3
Sibiu Gusterita	Natural	SB3	29.06.2021	I	Fabaceae	Medicago.falcata	11
Sibiu Gusterita	Natural	SB3	08.07.2021	II	Fabaceae	Medicago.falcata	40
Sibiu Gusterita	Natural	SB3	08.07.2021	III	Fabaceae	Medicago.falcata	40
Sibiu Gusterita	Natural	SB3	29.06.2021	I	Fabaceae	Medicago.lupulina	0.4
Sibiu Gusterita	Natural	SB3	08.07.2021	II	Fabaceae	Medicago.lupulina	0
Sibiu Gusterita	Natural	SB3	08.07.2021	III	Fabaceae	Medicago.lupulina	0.001
Sibiu Gusterita	Natural	SB3	29.06.2021	I	Fabaceae	Onobrychis.viciifolia	1
Sibiu Gusterita	Natural	SB3	08.07.2021	II	Fabaceae	Onobrychis.viciifolia	1.5
Sibiu Gusterita	Natural	SB3	08.07.2021	III	Fabaceae	Onobrychis.viciifolia	1.5
Sibiu Gusterita	Natural	SB3	29.06.2021	I	Orobanchaceae	Rhinanthus.major	1.5
Sibiu Gusterita	Natural	SB3	08.07.2021	II	Orobanchaceae	Rhinanthus.major	0.8
Sibiu Gusterita	Natural	SB3	08.07.2021	III	Orobanchaceae	Rhinanthus.major	0.8
Sibiu Gusterita	Natural	SB3	29.06.2021	I	Asteraceae	Tragopogon.orientalis	0.7
Sibiu Gusterita	Natural	SB3	08.07.2021	II	Asteraceae	Tragopogon.orientalis	0.001
Sibiu Gusterita	Natural	SB3	08.07.2021	III	Asteraceae	Tragopogon.orientalis	0.001
Sibiu Gusterita	Natural	SB3	29.06.2021	I	Fabaceae	Trifolium.pratense	0.3
Sibiu Gusterita	Natural	SB3	08.07.2021	II	Fabaceae	Trifolium.pratense	0.3
Sibiu Gusterita	Natural	SB3	08.07.2021	III	Fabaceae	Trifolium.pratense	0.3
Sibiu Gusterita	Natural	SB4	29.06.2021	I	Asteraceae	Achillea.millefolium	0.2
Sibiu Gusterita	Natural	SB4	08.07.2021	II	Asteraceae	Achillea.millefolium	0.2
Sibiu Gusterita	Natural	SB4	2021-07-07	III	Asteraceae	Achillea.millefolium	0.2
Sibiu Gusterita	Natural	SB4	29.06.2021	I	Rosaceae	Agrimonia.eupatoria	0.001
Sibiu Gusterita	Natural	SB4	08.07.2021	II	Rosaceae	Agrimonia.eupatoria	0.001
Sibiu Gusterita	Natural	SB4	2021-07-07	III	Rosaceae	Agrimonia.eupatoria	0.001
Sibiu Gusterita	Natural	SB4	29.06.2021	I	Rubiaceae	Asperula.cynanchica	0.8
Sibiu Gusterita	Natural	SB4	08.07.2021	II	Rubiaceae	Asperula.cynanchica	0.8
Sibiu Gusterita	Natural	SB4	2021-07-07	III	Rubiaceae	Asperula.cynanchica	0.8
Sibiu Gusterita	Natural	SB4	29.06.2021	I	Fabaceae	Astragalus.cicer	0.4
Sibiu Gusterita	Natural	SB4	08.07.2021	II	Fabaceae	Astragalus.cicer	0.4
Sibiu Gusterita	Natural	SB4	2021-07-07	III	Fabaceae	Astragalus.cicer	0.4
Sibiu Gusterita	Natural	SB4	29.06.2021	I	Asteraceae	Cichorium.intybus	0.5
Sibiu Gusterita	Natural	SB4	08.07.2021	II	Asteraceae	Cichorium.intybus	0.5
Sibiu Gusterita	Natural	SB4	2021-07-07	III	Asteraceae	Cichorium.intybus	0.5
Sibiu Gusterita	Natural	SB4	29.06.2021	I	Lamiaceae	Clinopodium.vulgare	0.2
Sibiu Gusterita	Natural	SB4	08.07.2021	II	Lamiaceae	Clinopodium.vulgare	0.2
Sibiu Gusterita	Natural	SB4	2021-07-07	III	Lamiaceae	Clinopodium.vulgare	0.2
Sibiu Gusterita	Natural	SB4	29.06.2021	I	Fabaceae	Coronilla.varia	8
Sibiu Gusterita	Natural	SB4	08.07.2021	II	Fabaceae	Coronilla.varia	8
Sibiu Gusterita	Natural	SB4	2021-07-07	III	Fabaceae	Coronilla.varia	8
Sibiu Gusterita	Natural	SB4	29.06.2021	I	Rosaceae	Erigeron.annuus	6
Sibiu Gusterita	Natural	SB4	08.07.2021	II	Rosaceae	Erigeron.annuus	6
Sibiu Gusterita	Natural	SB4	2021-07-07	III	Rosaceae	Erigeron.annuus	6
Sibiu Gusterita	Natural	SB4	2021-07-07	III	Rubiaceae	Galium.mollugo.album	0.1
Sibiu Gusterita	Natural	SB4	29.06.2021	I	Rubiaceae	Galium.mollugo.album	0.1
Sibiu Gusterita	Natural	SB4	08.07.2021	II	Rubiaceae	Galium.mollugo.album	0.1
Sibiu Gusterita	Natural	SB4	29.06.2021	I	Rubiaceae	Galium.verum	0.5
Sibiu Gusterita	Natural	SB4	08.07.2021	II	Rubiaceae	Galium.verum	0.5
Sibiu Gusterita	Natural	SB4	2021-07-07	III	Rubiaceae	Galium.verum	0.5
Sibiu Gusterita	Natural	SB4	29.06.2021	I	Dipsacaceae	Knautia.arvensis	0.4
Sibiu Gusterita	Natural	SB4	08.07.2021	II	Dipsacaceae	Knautia.arvensis	0.4
Sibiu Gusterita	Natural	SB4	2021-07-07	III	Dipsacaceae	Knautia.arvensis	0.4
Sibiu Gusterita	Natural	SB4	29.06.2021	I	Fabaceae	Lathyrus.tuberosus	0.2
Sibiu Gusterita	Natural	SB4	08.07.2021	II	Fabaceae	Lathyrus.tuberosus	0.2
Sibiu Gusterita	Natural	SB4	2021-07-07	III	Fabaceae	Lathyrus.tuberosus	0.2
Sibiu Gusterita	Natural	SB4	29.06.2021	I	Asteraceae	Leontodon.hispidus	0.001
Sibiu Gusterita	Natural	SB4	08.07.2021	II	Asteraceae	Leontodon.hispidus	0.001
Sibiu Gusterita	Natural	SB4	2021-07-07	III	Asteraceae	Leontodon.hispidus	0.001
Sibiu Gusterita	Natural	SB4	29.06.2021	I	Fabaceae	Lotus.corniculatus	1.5
Sibiu Gusterita	Natural	SB4	08.07.2021	II	Fabaceae	Lotus.corniculatus	1.5
Sibiu Gusterita	Natural	SB4	2021-07-07	III	Fabaceae	Lotus.corniculatus	1.5
Sibiu Gusterita	Natural	SB4	29.06.2021	I	Fabaceae	Medicago.falcata	0.3
Sibiu Gusterita	Natural	SB4	08.07.2021	II	Fabaceae	Medicago.falcata	0.3
Sibiu Gusterita	Natural	SB4	2021-07-07	III	Fabaceae	Medicago.falcata	0.3
Sibiu Gusterita	Natural	SB4	29.06.2021	I	Fabaceae	Medicago.lupulina	0.1
Sibiu Gusterita	Natural	SB4	08.07.2021	II	Fabaceae	Medicago.lupulina	0.1
Sibiu Gusterita	Natural	SB4	2021-07-07	III	Fabaceae	Medicago.lupulina	0.1
Sibiu Gusterita	Natural	SB4	29.06.2021	I	Fabaceae	Medicago.sativa	2
Sibiu Gusterita	Natural	SB4	08.07.2021	II	Fabaceae	Medicago.sativa	2
Sibiu Gusterita	Natural	SB4	2021-07-07	III	Fabaceae	Medicago.sativa	2
Sibiu Gusterita	Natural	SB4	29.06.2021	I	Fabaceae	Onobrychis.viciifolia	0.5
Sibiu Gusterita	Natural	SB4	08.07.2021	II	Fabaceae	Onobrychis.viciifolia	0.5
Sibiu Gusterita	Natural	SB4	2021-07-07	III	Fabaceae	Onobrychis.viciifolia	0.5
Sibiu Gusterita	Natural	SB4	29.06.2021	I	Plantaginaceae	Plantago.lanceolata	0.3
Sibiu Gusterita	Natural	SB4	08.07.2021	II	Plantaginaceae	Plantago.lanceolata	0.3
Sibiu Gusterita	Natural	SB4	2021-07-07	III	Plantaginaceae	Plantago.lanceolata	0.3
Sibiu Gusterita	Natural	SB4	29.06.2021	I	Plantaginaceae	Plantago.media	0.2
Sibiu Gusterita	Natural	SB4	08.07.2021	II	Plantaginaceae	Plantago.media	0.2
Sibiu Gusterita	Natural	SB4	2021-07-07	III	Plantaginaceae	Plantago.media	0.2
Sibiu Gusterita	Natural	SB4	29.06.2021	I	Lamiaceae	Prunella.vulgaris	0.4
Sibiu Gusterita	Natural	SB4	08.07.2021	II	Lamiaceae	Prunella.vulgaris	0.4
Sibiu Gusterita	Natural	SB4	2021-07-07	III	Lamiaceae	Prunella.vulgaris	0.4
Sibiu Gusterita	Natural	SB4	29.06.2021	I	Orobanchaceae	Rhinanthus.major	17
Sibiu Gusterita	Natural	SB4	08.07.2021	II	Orobanchaceae	Rhinanthus.major	17
Sibiu Gusterita	Natural	SB4	2021-07-07	III	Orobanchaceae	Rhinanthus.major	17
Sibiu Gusterita	Natural	SB4	29.06.2021	I	Lamiaceae	Salvia.nemorosa	1
Sibiu Gusterita	Natural	SB4	08.07.2021	II	Lamiaceae	Salvia.nemorosa	1
Sibiu Gusterita	Natural	SB4	2021-07-07	III	Lamiaceae	Salvia.nemorosa	1
Sibiu Gusterita	Natural	SB4	29.06.2021	I	Lamiaceae	Salvia.pratensis	0.5
Sibiu Gusterita	Natural	SB4	08.07.2021	II	Lamiaceae	Salvia.pratensis	0.5
Sibiu Gusterita	Natural	SB4	2021-07-07	III	Lamiaceae	Salvia.pratensis	0.5
Sibiu Gusterita	Natural	SB4	29.06.2021	I	Asteraceae	Tragopogon.orientalis	0.3
Sibiu Gusterita	Natural	SB4	08.07.2021	II	Asteraceae	Tragopogon.orientalis	0.3
Sibiu Gusterita	Natural	SB4	2021-07-07	III	Asteraceae	Tragopogon.orientalis	0.3
Sibiu Gusterita	Natural	SB4	29.06.2021	I	Fabaceae	Trifolium.pratense	2
Sibiu Gusterita	Natural	SB4	08.07.2021	II	Fabaceae	Trifolium.pratense	2
Sibiu Gusterita	Natural	SB4	2021-07-07	III	Fabaceae	Trifolium.pratense	2
Sibiu Gusterita	Natural	SB4	29.06.2021	I	Fabaceae	Trifolium.repens	0.8
Sibiu Gusterita	Natural	SB4	08.07.2021	II	Fabaceae	Trifolium.repens	0.8
Sibiu Gusterita	Natural	SB4	2021-07-07	III	Fabaceae	Trifolium.repens	0.8
Sibiu Gusterita	Natural	SB4	29.06.2021	I	Fabaceae	Vicia.cf.lutea	0.001
Sibiu Gusterita	Natural	SB4	08.07.2021	II	Fabaceae	Vicia.cf.lutea	0.001
Sibiu Gusterita	Natural	SB4	2021-07-07	III	Fabaceae	Vicia.cf.lutea	0.001
Sibiu Gusterita	Natural	SB5	29.06.2021	I	Asteraceae	Achillea.millefolium	0.001
Sibiu Gusterita	Natural	SB5	08.07.2021	II	Asteraceae	Achillea.millefolium	0.001
Sibiu Gusterita	Natural	SB5	2021-07-07	III	Asteraceae	Achillea.millefolium	0.001
Sibiu Gusterita	Natural	SB5	29.06.2021	I	Rosaceae	Agrimonia.eupatoria	0.2
Sibiu Gusterita	Natural	SB5	08.07.2021	II	Rosaceae	Agrimonia.eupatoria	0.2
Sibiu Gusterita	Natural	SB5	2021-07-07	III	Rosaceae	Agrimonia.eupatoria	0.2
Sibiu Gusterita	Natural	SB5	08.07.2021	II	Apiaceae	Anthriscus.sylvestris	0.5
Sibiu Gusterita	Natural	SB5	2021-07-07	III	Apiaceae	Anthriscus.sylvestris	0.5
Sibiu Gusterita	Natural	SB5	29.06.2021	I	Rubiaceae	Asperula.cynanchica	0.1
Sibiu Gusterita	Natural	SB5	08.07.2021	II	Rubiaceae	Asperula.cynanchica	0.1
Sibiu Gusterita	Natural	SB5	2021-07-07	III	Rubiaceae	Asperula.cynanchica	0.1
Sibiu Gusterita	Natural	SB5	29.06.2021	I	Fabaceae	Astragalus.cicer	5
Sibiu Gusterita	Natural	SB5	08.07.2021	II	Fabaceae	Astragalus.cicer	5
Sibiu Gusterita	Natural	SB5	2021-07-07	III	Fabaceae	Astragalus.cicer	5
Sibiu Gusterita	Natural	SB5	29.06.2021	I	Fabaceae	Astragalus.onobrychis	6
Sibiu Gusterita	Natural	SB5	08.07.2021	II	Fabaceae	Astragalus.onobrychis	6
Sibiu Gusterita	Natural	SB5	2021-07-07	III	Fabaceae	Astragalus.onobrychis	6
Sibiu Gusterita	Natural	SB5	29.06.2021	I	Asteraceae	Cichorium.intybus	0.001
Sibiu Gusterita	Natural	SB5	08.07.2021	II	Asteraceae	Cichorium.intybus	0.001
Sibiu Gusterita	Natural	SB5	2021-07-07	III	Asteraceae	Cichorium.intybus	0.001
Sibiu Gusterita	Natural	SB5	29.06.2021	I	Fabaceae	Coronilla.varia	5
Sibiu Gusterita	Natural	SB5	08.07.2021	II	Fabaceae	Coronilla.varia	5
Sibiu Gusterita	Natural	SB5	2021-07-07	III	Fabaceae	Coronilla.varia	5
Sibiu Gusterita	Natural	SB5	29.06.2021	I	Fabaceae	Dorycnium.herbaceum	20
Sibiu Gusterita	Natural	SB5	08.07.2021	II	Fabaceae	Dorycnium.herbaceum	20
Sibiu Gusterita	Natural	SB5	2021-07-07	III	Fabaceae	Dorycnium.herbaceum	20
Sibiu Gusterita	Natural	SB5	29.06.2021	I	Rosaceae	Erigeron.annuus	0.3
Sibiu Gusterita	Natural	SB5	08.07.2021	II	Rosaceae	Erigeron.annuus	0.3
Sibiu Gusterita	Natural	SB5	2021-07-07	III	Rosaceae	Erigeron.annuus	0.3
Sibiu Gusterita	Natural	SB5	29.06.2021	I	Rubiaceae	Galium.verum	0.5
Sibiu Gusterita	Natural	SB5	08.07.2021	II	Rubiaceae	Galium.verum	0.5
Sibiu Gusterita	Natural	SB5	2021-07-07	III	Rubiaceae	Galium.verum	0.5
Sibiu Gusterita	Natural	SB5	29.06.2021	I	Hypericaceae	Hypericum.perforatum	0.3
Sibiu Gusterita	Natural	SB5	08.07.2021	II	Hypericaceae	Hypericum.perforatum	0.3
Sibiu Gusterita	Natural	SB5	2021-07-07	III	Hypericaceae	Hypericum.perforatum	0.3
Sibiu Gusterita	Natural	SB5	29.06.2021	I	Dipsacaceae	Knautia.arvensis	0.5
Sibiu Gusterita	Natural	SB5	08.07.2021	II	Dipsacaceae	Knautia.arvensis	0.5
Sibiu Gusterita	Natural	SB5	2021-07-07	III	Dipsacaceae	Knautia.arvensis	0.5
Sibiu Gusterita	Natural	SB5	29.06.2021	I	Asteraceae	Leontodon.hispidus	0.2
Sibiu Gusterita	Natural	SB5	08.07.2021	II	Asteraceae	Leontodon.hispidus	0.3
Sibiu Gusterita	Natural	SB5	2021-07-07	III	Asteraceae	Leontodon.hispidus	0.3
Sibiu Gusterita	Natural	SB5	29.06.2021	I	Linaceae	Linum.austriacum	0.5
Sibiu Gusterita	Natural	SB5	08.07.2021	II	Linaceae	Linum.austriacum	0.5
Sibiu Gusterita	Natural	SB5	2021-07-07	III	Linaceae	Linum.austriacum	0.5
Sibiu Gusterita	Natural	SB5	29.06.2021	I	Fabaceae	Lotus.corniculatus	0.6
Sibiu Gusterita	Natural	SB5	08.07.2021	II	Fabaceae	Lotus.corniculatus	0.6
Sibiu Gusterita	Natural	SB5	2021-07-07	III	Fabaceae	Lotus.corniculatus	0.6
Sibiu Gusterita	Natural	SB5	29.06.2021	I	Fabaceae	Medicago.falcata	25
Sibiu Gusterita	Natural	SB5	08.07.2021	II	Fabaceae	Medicago.falcata	25
Sibiu Gusterita	Natural	SB5	2021-07-07	III	Fabaceae	Medicago.falcata	25
Sibiu Gusterita	Natural	SB5	29.06.2021	I	Fabaceae	Medicago.lupulina	0.7
Sibiu Gusterita	Natural	SB5	08.07.2021	II	Fabaceae	Medicago.lupulina	0.7
Sibiu Gusterita	Natural	SB5	2021-07-07	III	Fabaceae	Medicago.lupulina	0.7
Sibiu Gusterita	Natural	SB5	29.06.2021	I	Fabaceae	Onobrychis.viciifolia	0.4
Sibiu Gusterita	Natural	SB5	08.07.2021	II	Fabaceae	Onobrychis.viciifolia	0.4
Sibiu Gusterita	Natural	SB5	2021-07-07	III	Fabaceae	Onobrychis.viciifolia	0.4
Sibiu Gusterita	Natural	SB5	29.06.2021	I	Plantaginaceae	Plantago.media	0.001
Sibiu Gusterita	Natural	SB5	08.07.2021	II	Plantaginaceae	Plantago.media	0.001
Sibiu Gusterita	Natural	SB5	2021-07-07	III	Plantaginaceae	Plantago.media	0.001
Sibiu Gusterita	Natural	SB5	29.06.2021	I	Lamiaceae	Prunella.laciniata	0.2
Sibiu Gusterita	Natural	SB5	08.07.2021	II	Lamiaceae	Prunella.laciniata	0.2
Sibiu Gusterita	Natural	SB5	2021-07-07	III	Lamiaceae	Prunella.laciniata	0.2
Sibiu Gusterita	Natural	SB5	29.06.2021	I	Lamiaceae	Salvia.pratensis	0.4
Sibiu Gusterita	Natural	SB5	08.07.2021	II	Lamiaceae	Salvia.pratensis	0.4
Sibiu Gusterita	Natural	SB5	2021-07-07	III	Lamiaceae	Salvia.pratensis	0.4
Sibiu Gusterita	Natural	SB5	29.06.2021	I	Caprifoliaceae	Scabiosa.ochroleuca	0.3
Sibiu Gusterita	Natural	SB5	08.07.2021	II	Caprifoliaceae	Scabiosa.ochroleuca	0.3
Sibiu Gusterita	Natural	SB5	2021-07-07	III	Caprifoliaceae	Scabiosa.ochroleuca	0.3
Sibiu Gusterita	Natural	SB5	29.06.2021	I	Asteraceae	Senecio.jacobea	0.5
Sibiu Gusterita	Natural	SB5	08.07.2021	II	Asteraceae	Senecio.jacobea	0.5
Sibiu Gusterita	Natural	SB5	2021-07-07	III	Asteraceae	Senecio.jacobea	0.5
Sibiu Gusterita	Natural	SB5	2021-07-07	III	Asteraceae	Serratula.tinctoria	0.001
Sibiu Gusterita	Natural	SB5	08.07.2021	II	Asteraceae	Serratula.tinctoria	0.001
Sibiu Gusterita	Natural	SB5	29.06.2021	I	Lamiaceae	Teucrium.chamaedrys	3
Sibiu Gusterita	Natural	SB5	08.07.2021	II	Lamiaceae	Teucrium.chamaedrys	3
Sibiu Gusterita	Natural	SB5	2021-07-07	III	Lamiaceae	Teucrium.chamaedrys	3
Sibiu Gusterita	Natural	SB5	29.06.2021	I	Lamiaceae	Thymus.sp	0.5
Sibiu Gusterita	Natural	SB5	08.07.2021	II	Lamiaceae	Thymus.sp	0.5
Sibiu Gusterita	Natural	SB5	2021-07-07	III	Lamiaceae	Thymus.sp	0.5
Sibiu Gusterita	Natural	SB5	29.06.2021	I	Fabaceae	Trifolium.pratense	0.6
Sibiu Gusterita	Natural	SB5	08.07.2021	II	Fabaceae	Trifolium.pratense	0.6
Sibiu Gusterita	Natural	SB5	2021-07-07	III	Fabaceae	Trifolium.pratense	0.6
Sibiu Gusterita	Natural	SB5	29.06.2021	I	Fabaceae	Trifolium.repens	0.3
Sibiu Gusterita	Natural	SB5	08.07.2021	II	Fabaceae	Trifolium.repens	0.001
Sibiu Gusterita	Natural	SB5	2021-07-07	III	Fabaceae	Trifolium.repens	0.001
Sibiu Gusterita	Pasture	SB6	29.06.2021	I	Asteraceae	Achillea.millefolium	1.5
Sibiu Gusterita	Pasture	SB6	07.07.2021	II	Asteraceae	Achillea.millefolium	3
Sibiu Gusterita	Pasture	SB6	07.07.2021	III	Asteraceae	Achillea.millefolium	3
Sibiu Gusterita	Pasture	SB6	07.07.2021	II	Rosaceae	Agrimonia.eupatoria	0.001
Sibiu Gusterita	Pasture	SB6	07.07.2021	III	Rosaceae	Agrimonia.eupatoria	0.001
Sibiu Gusterita	Pasture	SB6	07.07.2021	II	Primulaceae	Anagallis.arvensis	0.001
Sibiu Gusterita	Pasture	SB6	07.07.2021	III	Primulaceae	Anagallis.arvensis	0.001
Sibiu Gusterita	Pasture	SB6	29.06.2021	I	Rubiaceae	Asperula.cynanchica	0.1
Sibiu Gusterita	Pasture	SB6	07.07.2021	II	Rubiaceae	Asperula.cynanchica	0.2
Sibiu Gusterita	Pasture	SB6	07.07.2021	III	Rubiaceae	Asperula.cynanchica	0.2
Sibiu Gusterita	Pasture	SB6	07.07.2021	II	Caryophyllaceae	Cerastium.holosteoides	0.001
Sibiu Gusterita	Pasture	SB6	07.07.2021	III	Caryophyllaceae	Cerastium.holosteoides	0.001
Sibiu Gusterita	Pasture	SB6	07.07.2021	II	Lamiaceae	Clinopodium.vulgare	0.001
Sibiu Gusterita	Pasture	SB6	07.07.2021	III	Lamiaceae	Clinopodium.vulgare	0.001
Sibiu Gusterita	Pasture	SB6	29.06.2021	I	Fabaceae	Coronilla.varia	0.3
Sibiu Gusterita	Pasture	SB6	07.07.2021	II	Fabaceae	Coronilla.varia	0.5
Sibiu Gusterita	Pasture	SB6	07.07.2021	III	Fabaceae	Coronilla.varia	0.5
Sibiu Gusterita	Pasture	SB6	07.07.2021	II	Apiaceae	Daucus.carota	0.4
Sibiu Gusterita	Pasture	SB6	07.07.2021	III	Apiaceae	Daucus.carota	0.4
Sibiu Gusterita	Pasture	SB6	07.07.2021	II	Caryophyllaceae	Dianthus.armeria	0.2
Sibiu Gusterita	Pasture	SB6	07.07.2021	III	Caryophyllaceae	Dianthus.armeria	0.2
Sibiu Gusterita	Pasture	SB6	29.06.2021	I	Caryophyllaceae	Dianthus.carthusianorum	0.9
Sibiu Gusterita	Pasture	SB6	07.07.2021	II	Caryophyllaceae	Dianthus.carthusianorum	0.5
Sibiu Gusterita	Pasture	SB6	07.07.2021	III	Caryophyllaceae	Dianthus.carthusianorum	0.5
Sibiu Gusterita	Pasture	SB6	07.07.2021	II	Apiaceae	Eryngium.campestre	0.3
Sibiu Gusterita	Pasture	SB6	07.07.2021	III	Apiaceae	Eryngium.campestre	0.3
Sibiu Gusterita	Pasture	SB6	29.06.2021	I	Euphorbiaceae	Euphorbia.cyparissias	0.4
Sibiu Gusterita	Pasture	SB6	07.07.2021	II	Euphorbiaceae	Euphorbia.cyparissias	0.3
Sibiu Gusterita	Pasture	SB6	07.07.2021	III	Euphorbiaceae	Euphorbia.cyparissias	0.3
Sibiu Gusterita	Pasture	SB6	29.06.2021	I	Orobanchaceae	Euphrasia.minima	0.4
Sibiu Gusterita	Pasture	SB6	07.07.2021	II	Orobanchaceae	Euphrasia.minima	0.4
Sibiu Gusterita	Pasture	SB6	07.07.2021	III	Orobanchaceae	Euphrasia.minima	0.4
Sibiu Gusterita	Pasture	SB6	29.06.2021	I	Rubiaceae	Galium.verum	0.3
Sibiu Gusterita	Pasture	SB6	07.07.2021	II	Rubiaceae	Galium.verum	0.3
Sibiu Gusterita	Pasture	SB6	07.07.2021	III	Rubiaceae	Galium.verum	0.3
Sibiu Gusterita	Pasture	SB6	29.06.2021	I	Cistaceae	Helianthemum.nummularium	0.2
Sibiu Gusterita	Pasture	SB6	07.07.2021	II	Cistaceae	Helianthemum.nummularium	0.2
Sibiu Gusterita	Pasture	SB6	07.07.2021	III	Cistaceae	Helianthemum.nummularium	0.2
Sibiu Gusterita	Pasture	SB6	29.06.2021	I	Asteraceae	Hieracium.pilosella	0.1
Sibiu Gusterita	Pasture	SB6	07.07.2021	II	Asteraceae	Hieracium.pilosella	0.001
Sibiu Gusterita	Pasture	SB6	07.07.2021	III	Asteraceae	Hieracium.pilosella	0.001
Sibiu Gusterita	Pasture	SB6	07.07.2021	II	Hypericaceae	Hypericum.perforatum	0.001
Sibiu Gusterita	Pasture	SB6	07.07.2021	III	Hypericaceae	Hypericum.perforatum	0.001
Sibiu Gusterita	Pasture	SB6	07.07.2021	II	Asteraceae	Hypochaeris.radicata	0.3
Sibiu Gusterita	Pasture	SB6	07.07.2021	III	Asteraceae	Hypochaeris.radicata	0.3
Sibiu Gusterita	Pasture	SB6	29.06.2021	I	Asteraceae	Leontodon.hispidus	0.1
Sibiu Gusterita	Pasture	SB6	07.07.2021	II	Asteraceae	Leontodon.hispidus	0.5
Sibiu Gusterita	Pasture	SB6	07.07.2021	III	Asteraceae	Leontodon.hispidus	0.5
Sibiu Gusterita	Pasture	SB6	29.06.2021	I	Fabaceae	Lotus.corniculatus	0.3
Sibiu Gusterita	Pasture	SB6	07.07.2021	II	Fabaceae	Lotus.corniculatus	0.2
Sibiu Gusterita	Pasture	SB6	07.07.2021	III	Fabaceae	Lotus.corniculatus	0.2
Sibiu Gusterita	Pasture	SB6	29.06.2021	I	Plantaginaceae	Plantago.lanceolata	0.2
Sibiu Gusterita	Pasture	SB6	07.07.2021	II	Plantaginaceae	Plantago.lanceolata	0.3
Sibiu Gusterita	Pasture	SB6	07.07.2021	III	Plantaginaceae	Plantago.lanceolata	0.3
Sibiu Gusterita	Pasture	SB6	29.06.2021	I	Plantaginaceae	Plantago.media	0.2
Sibiu Gusterita	Pasture	SB6	07.07.2021	II	Plantaginaceae	Plantago.media	0.3
Sibiu Gusterita	Pasture	SB6	07.07.2021	III	Plantaginaceae	Plantago.media	0.3
Sibiu Gusterita	Pasture	SB6	07.07.2021	II	Polygalaceae	Polygala.vulgaris	0.15
Sibiu Gusterita	Pasture	SB6	07.07.2021	III	Polygalaceae	Polygala.vulgaris	0.15
Sibiu Gusterita	Pasture	SB6	29.06.2021	I	Lamiaceae	Prunella.laciniata	2
Sibiu Gusterita	Pasture	SB6	07.07.2021	II	Lamiaceae	Prunella.laciniata	1
Sibiu Gusterita	Pasture	SB6	07.07.2021	III	Lamiaceae	Prunella.laciniata	1
Sibiu Gusterita	Pasture	SB6	29.06.2021	I	Rosaceae	Rosa.sp	0.001
Sibiu Gusterita	Pasture	SB6	07.07.2021	II	Rosaceae	Rosa.sp	0.001
Sibiu Gusterita	Pasture	SB6	07.07.2021	III	Rosaceae	Rosa.sp	0.001
Sibiu Gusterita	Pasture	SB6	07.07.2021	II	Caprifoliaceae	Scabiosa.ochroleuca	0.2
Sibiu Gusterita	Pasture	SB6	07.07.2021	III	Caprifoliaceae	Scabiosa.ochroleuca	0.2
Sibiu Gusterita	Pasture	SB6	07.07.2021	II	Lamiaceae	Teucrium.chamaedrys	0.4
Sibiu Gusterita	Pasture	SB6	07.07.2021	III	Lamiaceae	Teucrium.chamaedrys	0.4
Sibiu Gusterita	Pasture	SB6	29.06.2021	I	Santalaceae	Thesium.linophyllon	0.1
Sibiu Gusterita	Pasture	SB6	07.07.2021	II	Santalaceae	Thesium.linophyllon	0
Sibiu Gusterita	Pasture	SB6	07.07.2021	III	Santalaceae	Thesium.linophyllon	0
Sibiu Gusterita	Pasture	SB6	29.06.2021	I	Lamiaceae	Thymus.sp	0.2
Sibiu Gusterita	Pasture	SB6	07.07.2021	II	Lamiaceae	Thymus.sp	0.4
Sibiu Gusterita	Pasture	SB6	07.07.2021	III	Lamiaceae	Thymus.sp	0.4
Sibiu Gusterita	Pasture	SB6	07.07.2021	II	Fabaceae	Trifolium.arvense	0.2
Sibiu Gusterita	Pasture	SB6	07.07.2021	III	Fabaceae	Trifolium.arvense	0.2
Sibiu Gusterita	Pasture	SB6	29.06.2021	I	Fabaceae	Trifolium.campestre	25
Sibiu Gusterita	Pasture	SB6	07.07.2021	II	Fabaceae	Trifolium.campestre	20
Sibiu Gusterita	Pasture	SB6	07.07.2021	III	Fabaceae	Trifolium.campestre	20
Sibiu Gusterita	Pasture	SB6	07.07.2021	II	Fabaceae	Trifolium.medium	0.2
Sibiu Gusterita	Pasture	SB6	07.07.2021	III	Fabaceae	Trifolium.medium	0.2
Sibiu Gusterita	Pasture	SB6	29.06.2021	I	Fabaceae	Trifolium.ochroleucon	2.5
Sibiu Gusterita	Pasture	SB6	07.07.2021	II	Fabaceae	Trifolium.ochroleucon	0.3
Sibiu Gusterita	Pasture	SB6	07.07.2021	III	Fabaceae	Trifolium.ochroleucon	0.3
Sibiu Gusterita	Pasture	SB6	29.06.2021	I	Fabaceae	Trifolium.pratense	0.8
Sibiu Gusterita	Pasture	SB6	07.07.2021	II	Fabaceae	Trifolium.pratense	0.2
Sibiu Gusterita	Pasture	SB6	07.07.2021	III	Fabaceae	Trifolium.pratense	0.2
Sibiu Gusterita	Pasture	SB6	29.06.2021	I	Fabaceae	Trifolium.repens	0.3
Sibiu Gusterita	Pasture	SB6	07.07.2021	II	Fabaceae	Trifolium.repens	0.2
Sibiu Gusterita	Pasture	SB6	07.07.2021	III	Fabaceae	Trifolium.repens	0.2
Sibiu Gusterita	Pasture	SB7	29.06.2021	I	Asteraceae	Achillea.millefolium	1
Sibiu Gusterita	Pasture	SB7	07.07.2021	II	Asteraceae	Achillea.millefolium	1
Sibiu Gusterita	Pasture	SB7	07.07.2021	III	Asteraceae	Achillea.millefolium	1
Sibiu Gusterita	Pasture	SB7	07.07.2021	II	Rosaceae	Agrimonia.eupatoria	0.001
Sibiu Gusterita	Pasture	SB7	07.07.2021	III	Rosaceae	Agrimonia.eupatoria	0.001
Sibiu Gusterita	Pasture	SB7	07.07.2021	II	Asparagaceae	Anthericum.ramosum	0.3
Sibiu Gusterita	Pasture	SB7	07.07.2021	III	Asparagaceae	Anthericum.ramosum	0.3
Sibiu Gusterita	Pasture	SB7	29.06.2021	I	Rubiaceae	Asperula.cynanchica	0.1
Sibiu Gusterita	Pasture	SB7	07.07.2021	II	Rubiaceae	Asperula.cynanchica	0.2
Sibiu Gusterita	Pasture	SB7	07.07.2021	III	Rubiaceae	Asperula.cynanchica	0.2
Sibiu Gusterita	Pasture	SB7	29.06.2021	I	Fabaceae	Astragalus.onobrychis	7
Sibiu Gusterita	Pasture	SB7	07.07.2021	II	Fabaceae	Astragalus.onobrychis	0.8
Sibiu Gusterita	Pasture	SB7	07.07.2021	III	Fabaceae	Astragalus.onobrychis	0.8
Sibiu Gusterita	Pasture	SB7	29.06.2021	I	Campanulaceae	Campanula.sibirica	0.3
Sibiu Gusterita	Pasture	SB7	07.07.2021	II	Campanulaceae	Campanula.sibirica	0.7
Sibiu Gusterita	Pasture	SB7	07.07.2021	III	Campanulaceae	Campanula.sibirica	0.7
Sibiu Gusterita	Pasture	SB7	29.06.2021	I	Gentianaceae	Centaurium.erythraea	0.2
Sibiu Gusterita	Pasture	SB7	07.07.2021	II	Gentianaceae	Centaurium.erythraea	0.3
Sibiu Gusterita	Pasture	SB7	07.07.2021	III	Gentianaceae	Centaurium.erythraea	0.3
Sibiu Gusterita	Pasture	SB7	29.06.2021	I	Lamiaceae	Clinopodium.acinos	0.2
Sibiu Gusterita	Pasture	SB7	07.07.2021	II	Lamiaceae	Clinopodium.acinos	0.3
Sibiu Gusterita	Pasture	SB7	07.07.2021	III	Lamiaceae	Clinopodium.acinos	0.3
Sibiu Gusterita	Pasture	SB7	29.06.2021	I	Lamiaceae	Clinopodium.vulgare	0.3
Sibiu Gusterita	Pasture	SB7	07.07.2021	II	Lamiaceae	Clinopodium.vulgare	0.2
Sibiu Gusterita	Pasture	SB7	07.07.2021	III	Lamiaceae	Clinopodium.vulgare	0.2
Sibiu Gusterita	Pasture	SB7	29.06.2021	I	Caryophyllaceae	Dianthus.carthusianorum	1
Sibiu Gusterita	Pasture	SB7	07.07.2021	II	Caryophyllaceae	Dianthus.carthusianorum	0.4
Sibiu Gusterita	Pasture	SB7	07.07.2021	III	Caryophyllaceae	Dianthus.carthusianorum	0.4
Sibiu Gusterita	Pasture	SB7	07.07.2021	II	Apiaceae	Eryngium.campestre	0.5
Sibiu Gusterita	Pasture	SB7	07.07.2021	III	Apiaceae	Eryngium.campestre	0.5
Sibiu Gusterita	Pasture	SB7	29.06.2021	I	Orobanchaceae	Euphrasia.minima	0.3
Sibiu Gusterita	Pasture	SB7	07.07.2021	II	Orobanchaceae	Euphrasia.minima	0.1
Sibiu Gusterita	Pasture	SB7	07.07.2021	III	Orobanchaceae	Euphrasia.minima	0.1
Sibiu Gusterita	Pasture	SB7	29.06.2021	I	Rosaceae	Filipendula.vulgaris	0.001
Sibiu Gusterita	Pasture	SB7	07.07.2021	II	Rosaceae	Filipendula.vulgaris	0
Sibiu Gusterita	Pasture	SB7	07.07.2021	III	Rosaceae	Filipendula.vulgaris	0
Sibiu Gusterita	Pasture	SB7	29.06.2021	I	Cistaceae	Helianthemum.nummularium	0.1
Sibiu Gusterita	Pasture	SB7	07.07.2021	II	Cistaceae	Helianthemum.nummularium	0.3
Sibiu Gusterita	Pasture	SB7	07.07.2021	III	Cistaceae	Helianthemum.nummularium	0.3
Sibiu Gusterita	Pasture	SB7	07.07.2021	II	Asteraceae	Hieracium.pilosella	0.3
Sibiu Gusterita	Pasture	SB7	07.07.2021	III	Asteraceae	Hieracium.pilosella	0.3
Sibiu Gusterita	Pasture	SB7	29.06.2021	I	Asteraceae	Leontodon.hispidus	0.2
Sibiu Gusterita	Pasture	SB7	07.07.2021	II	Asteraceae	Leontodon.hispidus	0.3
Sibiu Gusterita	Pasture	SB7	07.07.2021	III	Asteraceae	Leontodon.hispidus	0.3
Sibiu Gusterita	Pasture	SB7	29.06.2021	I	Linaceae	Linum.catharticum	0.1
Sibiu Gusterita	Pasture	SB7	07.07.2021	II	Linaceae	Linum.catharticum	0.1
Sibiu Gusterita	Pasture	SB7	07.07.2021	III	Linaceae	Linum.catharticum	0.1
Sibiu Gusterita	Pasture	SB7	07.07.2021	II	Fabaceae	Lotus.corniculatus	0.4
Sibiu Gusterita	Pasture	SB7	07.07.2021	III	Fabaceae	Lotus.corniculatus	0.4
Sibiu Gusterita	Pasture	SB7	29.06.2021	I	Fabaceae	Medicago.falcata	2
Sibiu Gusterita	Pasture	SB7	07.07.2021	II	Fabaceae	Medicago.falcata	0.4
Sibiu Gusterita	Pasture	SB7	07.07.2021	III	Fabaceae	Medicago.falcata	0.4
Sibiu Gusterita	Pasture	SB7	29.06.2021	I	Fabaceae	Medicago.lupulina	0.6
Sibiu Gusterita	Pasture	SB7	07.07.2021	II	Fabaceae	Medicago.lupulina	0.1
Sibiu Gusterita	Pasture	SB7	07.07.2021	III	Fabaceae	Medicago.lupulina	0.1
Sibiu Gusterita	Pasture	SB7	29.06.2021	I	Boraginaceae	Myositis.sp	0.001
Sibiu Gusterita	Pasture	SB7	07.07.2021	II	Boraginaceae	Myositis.sp	0.001
Sibiu Gusterita	Pasture	SB7	07.07.2021	III	Boraginaceae	Myositis.sp	0.001
Sibiu Gusterita	Pasture	SB7	29.06.2021	I	Orchidaceae	Neotinea.ustulata	0.001
Sibiu Gusterita	Pasture	SB7	07.07.2021	II	Orchidaceae	Neotinea.ustulata	0.2
Sibiu Gusterita	Pasture	SB7	07.07.2021	III	Orchidaceae	Neotinea.ustulata	0.2
Sibiu Gusterita	Pasture	SB7	29.06.2021	I	Fabaceae	Onobrychis.viciifolia	1
Sibiu Gusterita	Pasture	SB7	07.07.2021	II	Fabaceae	Onobrychis.viciifolia	0.5
Sibiu Gusterita	Pasture	SB7	07.07.2021	III	Fabaceae	Onobrychis.viciifolia	0.5
Sibiu Gusterita	Pasture	SB7	29.06.2021	I	Plantaginaceae	Plantago.lanceolata	0.2
Sibiu Gusterita	Pasture	SB7	07.07.2021	II	Plantaginaceae	Plantago.lanceolata	0.3
Sibiu Gusterita	Pasture	SB7	07.07.2021	III	Plantaginaceae	Plantago.lanceolata	0.3
Sibiu Gusterita	Pasture	SB7	29.06.2021	I	Plantaginaceae	Plantago.media	0.2
Sibiu Gusterita	Pasture	SB7	07.07.2021	II	Plantaginaceae	Plantago.media	0.4
Sibiu Gusterita	Pasture	SB7	07.07.2021	III	Plantaginaceae	Plantago.media	0.4
Sibiu Gusterita	Pasture	SB7	29.06.2021	I	Lamiaceae	Prunella.laciniata	1
Sibiu Gusterita	Pasture	SB7	07.07.2021	II	Lamiaceae	Prunella.laciniata	0.8
Sibiu Gusterita	Pasture	SB7	07.07.2021	III	Lamiaceae	Prunella.laciniata	0.8
Sibiu Gusterita	Pasture	SB7	29.06.2021	I	Lamiaceae	Prunella.vulgaris	0.2
Sibiu Gusterita	Pasture	SB7	07.07.2021	II	Lamiaceae	Prunella.vulgaris	0.1
Sibiu Gusterita	Pasture	SB7	07.07.2021	III	Lamiaceae	Prunella.vulgaris	0.1
Sibiu Gusterita	Pasture	SB7	29.06.2021	I	Caprifoliaceae	Scabiosa.ochroleuca	0.2
Sibiu Gusterita	Pasture	SB7	07.07.2021	II	Caprifoliaceae	Scabiosa.ochroleuca	0.1
Sibiu Gusterita	Pasture	SB7	07.07.2021	III	Caprifoliaceae	Scabiosa.ochroleuca	0.1
Sibiu Gusterita	Pasture	SB7	29.06.2021	I	Lamiaceae	Teucrium.chamaedrys	0.2
Sibiu Gusterita	Pasture	SB7	07.07.2021	II	Lamiaceae	Teucrium.chamaedrys	0.9
Sibiu Gusterita	Pasture	SB7	07.07.2021	III	Lamiaceae	Teucrium.chamaedrys	0.9
Sibiu Gusterita	Pasture	SB7	29.06.2021	I	Lamiaceae	Thymus.sp	0.1
Sibiu Gusterita	Pasture	SB7	07.07.2021	II	Lamiaceae	Thymus.sp	0.2
Sibiu Gusterita	Pasture	SB7	07.07.2021	III	Lamiaceae	Thymus.sp	0.2
Sibiu Gusterita	Pasture	SB7	29.06.2021	I	Fabaceae	Trifolium.campestre	10
Sibiu Gusterita	Pasture	SB7	07.07.2021	II	Fabaceae	Trifolium.campestre	6
Sibiu Gusterita	Pasture	SB7	07.07.2021	III	Fabaceae	Trifolium.campestre	6
Sibiu Gusterita	Pasture	SB7	29.06.2021	I	Fabaceae	Trifolium.medium	0.8
Sibiu Gusterita	Pasture	SB7	07.07.2021	II	Fabaceae	Trifolium.medium	0.2
Sibiu Gusterita	Pasture	SB7	07.07.2021	III	Fabaceae	Trifolium.medium	0.2
Sibiu Gusterita	Pasture	SB7	29.06.2021	I	Fabaceae	Trifolium.pratense	0.2
Sibiu Gusterita	Pasture	SB7	07.07.2021	II	Fabaceae	Trifolium.pratense	0.5
Sibiu Gusterita	Pasture	SB7	07.07.2021	III	Fabaceae	Trifolium.pratense	0.5
Sibiu Gusterita	Pasture	SB7	29.06.2021	I	Fabaceae	Trifolium.repens	0.6
Sibiu Gusterita	Pasture	SB7	07.07.2021	II	Fabaceae	Trifolium.repens	0.2
Sibiu Gusterita	Pasture	SB7	07.07.2021	III	Fabaceae	Trifolium.repens	0.2
Sibiu Gusterita	Pasture	SB8	29.06.2021	I	Asteraceae	Achillea.millefolium	0.5
Sibiu Gusterita	Pasture	SB8	06.07.2021	II	Asteraceae	Achillea.millefolium	0.5
Sibiu Gusterita	Pasture	SB8	2021-07-07	III	Asteraceae	Achillea.millefolium	0.5
Sibiu Gusterita	Pasture	SB8	29.06.2021	I	Rubiaceae	Asperula.cynanchica	0.3
Sibiu Gusterita	Pasture	SB8	06.07.2021	II	Rubiaceae	Asperula.cynanchica	0.3
Sibiu Gusterita	Pasture	SB8	2021-07-07	III	Rubiaceae	Asperula.cynanchica	0.3
Sibiu Gusterita	Pasture	SB8	06.07.2021	II	Gentianaceae	Centaurium.erythraea	0.2
Sibiu Gusterita	Pasture	SB8	2021-07-07	III	Gentianaceae	Centaurium.erythraea	0.2
Sibiu Gusterita	Pasture	SB8	29.06.2021	I	Lamiaceae	Clinopodium.acinos	0.2
Sibiu Gusterita	Pasture	SB8	06.07.2021	II	Lamiaceae	Clinopodium.acinos	0.2
Sibiu Gusterita	Pasture	SB8	2021-07-07	III	Lamiaceae	Clinopodium.acinos	0.2
Sibiu Gusterita	Pasture	SB8	06.07.2021	II	Lamiaceae	Clinopodium.vulgare	0.3
Sibiu Gusterita	Pasture	SB8	2021-07-07	III	Lamiaceae	Clinopodium.vulgare	0.3
Sibiu Gusterita	Pasture	SB8	29.06.2021	I	Apiaceae	Eryngium.campestre	0.5
Sibiu Gusterita	Pasture	SB8	06.07.2021	II	Apiaceae	Eryngium.campestre	0.5
Sibiu Gusterita	Pasture	SB8	2021-07-07	III	Apiaceae	Eryngium.campestre	0.5
Sibiu Gusterita	Pasture	SB8	29.06.2021	I	Orobanchaceae	Euphrasia.minima	0.2
Sibiu Gusterita	Pasture	SB8	06.07.2021	II	Orobanchaceae	Euphrasia.minima	0.2
Sibiu Gusterita	Pasture	SB8	2021-07-07	III	Orobanchaceae	Euphrasia.minima	0.2
Sibiu Gusterita	Pasture	SB8	29.06.2021	I	Rubiaceae	Galium.verum	0.2
Sibiu Gusterita	Pasture	SB8	06.07.2021	II	Rubiaceae	Galium.verum	0.2
Sibiu Gusterita	Pasture	SB8	2021-07-07	III	Rubiaceae	Galium.verum	0.2
Sibiu Gusterita	Pasture	SB8	29.06.2021	I	Cistaceae	Helianthemum.nummularium	0.1
Sibiu Gusterita	Pasture	SB8	06.07.2021	II	Cistaceae	Helianthemum.nummularium	0.1
Sibiu Gusterita	Pasture	SB8	2021-07-07	III	Cistaceae	Helianthemum.nummularium	0.1
Sibiu Gusterita	Pasture	SB8	06.07.2021	II	Asteraceae	Hieracium.pilosella	0.4
Sibiu Gusterita	Pasture	SB8	2021-07-07	III	Asteraceae	Hieracium.pilosella	0.4
Sibiu Gusterita	Pasture	SB8	06.07.2021	II	Asteraceae	Hypochaeris.radicata	0.3
Sibiu Gusterita	Pasture	SB8	2021-07-07	III	Asteraceae	Hypochaeris.radicata	0.3
Sibiu Gusterita	Pasture	SB8	29.06.2021	I	Asteraceae	Leontodon.hispidus	0.4
Sibiu Gusterita	Pasture	SB8	06.07.2021	II	Asteraceae	Leontodon.hispidus	0.4
Sibiu Gusterita	Pasture	SB8	2021-07-07	III	Asteraceae	Leontodon.hispidus	0.4
Sibiu Gusterita	Pasture	SB8	29.06.2021	I	Linaceae	Linum.catharticum	0.1
Sibiu Gusterita	Pasture	SB8	06.07.2021	II	Linaceae	Linum.catharticum	0.1
Sibiu Gusterita	Pasture	SB8	2021-07-07	III	Linaceae	Linum.catharticum	0.1
Sibiu Gusterita	Pasture	SB8	29.06.2021	I	Fabaceae	Lotus.corniculatus	1.5
Sibiu Gusterita	Pasture	SB8	06.07.2021	II	Fabaceae	Lotus.corniculatus	1.5
Sibiu Gusterita	Pasture	SB8	2021-07-07	III	Fabaceae	Lotus.corniculatus	1.5
Sibiu Gusterita	Pasture	SB8	29.06.2021	I	Fabaceae	Medicago.lupulina	1
Sibiu Gusterita	Pasture	SB8	06.07.2021	II	Fabaceae	Medicago.lupulina	1
Sibiu Gusterita	Pasture	SB8	2021-07-07	III	Fabaceae	Medicago.lupulina	1
Sibiu Gusterita	Pasture	SB8	29.06.2021	I	Plantaginaceae	Plantago.lanceolata	0.2
Sibiu Gusterita	Pasture	SB8	06.07.2021	II	Plantaginaceae	Plantago.lanceolata	0.2
Sibiu Gusterita	Pasture	SB8	2021-07-07	III	Plantaginaceae	Plantago.lanceolata	0.2
Sibiu Gusterita	Pasture	SB8	29.06.2021	I	Polygalaceae	Polygala.vulgaris	0.3
Sibiu Gusterita	Pasture	SB8	06.07.2021	II	Polygalaceae	Polygala.vulgaris	0.3
Sibiu Gusterita	Pasture	SB8	2021-07-07	III	Polygalaceae	Polygala.vulgaris	0.3
Sibiu Gusterita	Pasture	SB8	06.07.2021	II	Lamiaceae	Prunella.laciniata	0.3
Sibiu Gusterita	Pasture	SB8	2021-07-07	III	Lamiaceae	Prunella.laciniata	0.3
Sibiu Gusterita	Pasture	SB8	06.07.2021	II	Lamiaceae	Prunella.vulgaris	0.2
Sibiu Gusterita	Pasture	SB8	2021-07-07	III	Lamiaceae	Prunella.vulgaris	0.2
Sibiu Gusterita	Pasture	SB8	29.06.2021	I	Ranunculaceae	Ranunculus.small	0.3
Sibiu Gusterita	Pasture	SB8	06.07.2021	II	Ranunculaceae	Ranunculus.small	0.3
Sibiu Gusterita	Pasture	SB8	2021-07-07	III	Ranunculaceae	Ranunculus.small	0.3
Sibiu Gusterita	Pasture	SB8	29.06.2021	I	Caryophyllaceae	Stellaria.media	0.001
Sibiu Gusterita	Pasture	SB8	06.07.2021	II	Caryophyllaceae	Stellaria.media	0.001
Sibiu Gusterita	Pasture	SB8	2021-07-07	III	Caryophyllaceae	Stellaria.media	0.001
Sibiu Gusterita	Pasture	SB8	29.06.2021	I	Caryophyllaceae	Stellaria.graminea	0.4
Sibiu Gusterita	Pasture	SB8	06.07.2021	II	Caryophyllaceae	Stellaria.graminea	0.4
Sibiu Gusterita	Pasture	SB8	2021-07-07	III	Caryophyllaceae	Stellaria.graminea	0.4
Sibiu Gusterita	Pasture	SB8	29.06.2021	I	Lamiaceae	Thymus.sp	0.3
Sibiu Gusterita	Pasture	SB8	06.07.2021	II	Lamiaceae	Thymus.sp	0.3
Sibiu Gusterita	Pasture	SB8	2021-07-07	III	Lamiaceae	Thymus.sp	0.3
Sibiu Gusterita	Pasture	SB8	06.07.2021	II	Fabaceae	Trifolium.arvense	1
Sibiu Gusterita	Pasture	SB8	2021-07-07	III	Fabaceae	Trifolium.arvense	1
Sibiu Gusterita	Pasture	SB8	29.06.2021	I	Fabaceae	Trifolium.campestre	2
Sibiu Gusterita	Pasture	SB8	06.07.2021	II	Fabaceae	Trifolium.campestre	2
Sibiu Gusterita	Pasture	SB8	2021-07-07	III	Fabaceae	Trifolium.campestre	2
Sibiu Gusterita	Pasture	SB8	29.06.2021	I	Fabaceae	Trifolium.pratense	2
Sibiu Gusterita	Pasture	SB8	06.07.2021	II	Fabaceae	Trifolium.pratense	2
Sibiu Gusterita	Pasture	SB8	2021-07-07	III	Fabaceae	Trifolium.pratense	2
Sibiu Gusterita	Pasture	SB8	29.06.2021	I	Fabaceae	Trifolium.repens	2
Sibiu Gusterita	Pasture	SB8	06.07.2021	II	Fabaceae	Trifolium.repens	2
Sibiu Gusterita	Pasture	SB8	2021-07-07	III	Fabaceae	Trifolium.repens	2
Sibiu Gusterita	Pasture	SB9	29.06.2021	I	Asteraceae	Achillea.millefolium	1
Sibiu Gusterita	Pasture	SB9	07.07.2021	II	Asteraceae	Achillea.millefolium	1
Sibiu Gusterita	Pasture	SB9	07.07.2022	III	Asteraceae	Achillea.millefolium	1
Sibiu Gusterita	Pasture	SB9	29.06.2021	I	Asteraceae	Carduus.nutans	1
Sibiu Gusterita	Pasture	SB9	07.07.2021	II	Asteraceae	Carduus.nutans	0.5
Sibiu Gusterita	Pasture	SB9	07.07.2023	III	Asteraceae	Carduus.nutans	0.5
Sibiu Gusterita	Pasture	SB9	29.06.2021	I	Caryophyllaceae	Cerastium.holosteoides	0.1
Sibiu Gusterita	Pasture	SB9	07.07.2021	II	Caryophyllaceae	Cerastium.holosteoides	0.1
Sibiu Gusterita	Pasture	SB9	07.07.2023	III	Caryophyllaceae	Cerastium.holosteoides	0.1
Sibiu Gusterita	Pasture	SB9	29.06.2021	I	Apiaceae	Daucus.carota	0.001
Sibiu Gusterita	Pasture	SB9	07.07.2021	II	Apiaceae	Daucus.carota	0.4
Sibiu Gusterita	Pasture	SB9	07.07.2022	III	Apiaceae	Daucus.carota	0.4
Sibiu Gusterita	Pasture	SB9	2021-07-07	II	Apiaceae	Eryngium.campestre	0.3
Sibiu Gusterita	Pasture	SB9	07.07.2022	III	Apiaceae	Eryngium.campestre	0.3
Sibiu Gusterita	Pasture	SB9	29.06.2021	I	Orobanchaceae	Euphrasia.minima	0.2
Sibiu Gusterita	Pasture	SB9	07.07.2021	II	Orobanchaceae	Euphrasia.minima	0.3
Sibiu Gusterita	Pasture	SB9	07.07.2023	III	Orobanchaceae	Euphrasia.minima	0.3
Sibiu Gusterita	Pasture	SB9	29.06.2021	I	Rosaceae	Filipendula.vulgaris	0.001
Sibiu Gusterita	Pasture	SB9	07.07.2021	II	Rosaceae	Filipendula.vulgaris	0
Sibiu Gusterita	Pasture	SB9	07.07.2023	III	Rosaceae	Filipendula.vulgaris	0
Sibiu Gusterita	Pasture	SB9	29.06.2021	I	Rubiaceae	Galium.verum	0.3
Sibiu Gusterita	Pasture	SB9	07.07.2021	II	Rubiaceae	Galium.verum	0.5
Sibiu Gusterita	Pasture	SB9	07.07.2023	III	Rubiaceae	Galium.verum	0.5
Sibiu Gusterita	Pasture	SB9	29.06.2021	I	Asteraceae	Hieracium.pilosella	0.001
Sibiu Gusterita	Pasture	SB9	07.07.2021	II	Asteraceae	Hieracium.pilosella	0
Sibiu Gusterita	Pasture	SB9	07.07.2022	III	Asteraceae	Hieracium.pilosella	0
Sibiu Gusterita	Pasture	SB9	29.06.2021	I	Asteraceae	Hypochaeris.radicata	1
Sibiu Gusterita	Pasture	SB9	07.07.2021	II	Asteraceae	Hypochaeris.radicata	0.3
Sibiu Gusterita	Pasture	SB9	07.07.2022	III	Asteraceae	Hypochaeris.radicata	0.3
Sibiu Gusterita	Pasture	SB9	29.06.2021	I	Linaceae	Linum.catharticum	0.1
Sibiu Gusterita	Pasture	SB9	07.07.2021	II	Linaceae	Linum.catharticum	0.1
Sibiu Gusterita	Pasture	SB9	07.07.2022	III	Linaceae	Linum.catharticum	0.1
Sibiu Gusterita	Pasture	SB9	29.06.2021	I	Fabaceae	Lotus.corniculatus	0.5
Sibiu Gusterita	Pasture	SB9	07.07.2021	II	Fabaceae	Lotus.corniculatus	0.4
Sibiu Gusterita	Pasture	SB9	07.07.2022	III	Fabaceae	Lotus.corniculatus	0.4
Sibiu Gusterita	Pasture	SB9	29.06.2021	I	Fabaceae	Medicago.lupulina	0.3
Sibiu Gusterita	Pasture	SB9	07.07.2021	II	Fabaceae	Medicago.lupulina	0
Sibiu Gusterita	Pasture	SB9	07.07.2022	III	Fabaceae	Medicago.lupulina	0
Sibiu Gusterita	Pasture	SB9	29.06.2021	I	Plantaginaceae	Plantago.lanceolata	0.3
Sibiu Gusterita	Pasture	SB9	07.07.2021	II	Plantaginaceae	Plantago.lanceolata	0.3
Sibiu Gusterita	Pasture	SB9	07.07.2022	III	Plantaginaceae	Plantago.lanceolata	0.3
Sibiu Gusterita	Pasture	SB9	29.06.2021	I	Plantaginaceae	Plantago.media	0.2
Sibiu Gusterita	Pasture	SB9	07.07.2021	II	Plantaginaceae	Plantago.media	0.3
Sibiu Gusterita	Pasture	SB9	07.07.2022	III	Plantaginaceae	Plantago.media	0.3
Sibiu Gusterita	Pasture	SB9	29.06.2021	I	Polygalaceae	Polygala.vulgaris	0.3
Sibiu Gusterita	Pasture	SB9	07.07.2021	II	Polygalaceae	Polygala.vulgaris	0.3
Sibiu Gusterita	Pasture	SB9	07.07.2022	III	Polygalaceae	Polygala.vulgaris	0.3
Sibiu Gusterita	Pasture	SB9	29.06.2021	I	Rosaceae	Potentilla.argentea	0.1
Sibiu Gusterita	Pasture	SB9	07.07.2021	II	Rosaceae	Potentilla.argentea	0
Sibiu Gusterita	Pasture	SB9	07.07.2023	III	Rosaceae	Potentilla.argentea	0
Sibiu Gusterita	Pasture	SB9	07.07.2021	II	Lamiaceae	Prunella.laciniata	0.4
Sibiu Gusterita	Pasture	SB9	07.07.2023	III	Lamiaceae	Prunella.laciniata	0.4
Sibiu Gusterita	Pasture	SB9	07.07.2021	II	Lamiaceae	Prunella.vulgaris	0.2
Sibiu Gusterita	Pasture	SB9	07.07.2022	III	Lamiaceae	Prunella.vulgaris	0.2
Sibiu Gusterita	Pasture	SB9	29.06.2021	I	Ranunculaceae	Ranunculus.small	0.1
Sibiu Gusterita	Pasture	SB9	07.07.2021	II	Ranunculaceae	Ranunculus.small	0
Sibiu Gusterita	Pasture	SB9	07.07.2022	III	Ranunculaceae	Ranunculus.small	0
Sibiu Gusterita	Pasture	SB9	29.06.2021	I	Rosaceae	Rosa.sp	0.001
Sibiu Gusterita	Pasture	SB9	07.07.2021	II	Rosaceae	Rosa.sp	0.001
Sibiu Gusterita	Pasture	SB9	07.07.2022	III	Rosaceae	Rosa.sp	0.001
Sibiu Gusterita	Pasture	SB9	29.06.2021	I	Caryophyllaceae	Stellaria.graminea	0.2
Sibiu Gusterita	Pasture	SB9	07.07.2021	II	Caryophyllaceae	Stellaria.graminea	0.1
Sibiu Gusterita	Pasture	SB9	07.07.2022	III	Caryophyllaceae	Stellaria.graminea	0.1
Sibiu Gusterita	Pasture	SB9	29.06.2021	I	Lamiaceae	Thymus.sp	0.4
Sibiu Gusterita	Pasture	SB9	07.07.2021	II	Lamiaceae	Thymus.sp	0.6
Sibiu Gusterita	Pasture	SB9	07.07.2022	III	Lamiaceae	Thymus.sp	0.6
Sibiu Gusterita	Pasture	SB9	29.06.2021	I	Fabaceae	Trifolium.campestre	1
Sibiu Gusterita	Pasture	SB9	07.07.2021	II	Fabaceae	Trifolium.campestre	0.8
Sibiu Gusterita	Pasture	SB9	07.07.2022	III	Fabaceae	Trifolium.campestre	0.8
Sibiu Gusterita	Pasture	SB9	29.06.2021	I	Fabaceae	Trifolium.pratense	1
Sibiu Gusterita	Pasture	SB9	07.07.2021	II	Fabaceae	Trifolium.pratense	1
Sibiu Gusterita	Pasture	SB9	07.07.2023	III	Fabaceae	Trifolium.pratense	1
Sibiu Gusterita	Pasture	SB9	29.06.2021	I	Fabaceae	Trifolium.repens	0.4
Sibiu Gusterita	Pasture	SB9	07.07.2021	II	Fabaceae	Trifolium.repens	0.2
Sibiu Gusterita	Pasture	SB9	07.07.2022	III	Fabaceae	Trifolium.repens	0.2
