# Supplementary material for: Intensive pasture management alters the composition and structure of plant-pollinator interactions in Sibiu, Romania
Source: PeerJ. 2024 Feb 29;12:e16900. doi: 10.7717/peerj.16900 (PMC10909354; doi:10.7717/peerj.16900)
Supplement: Supplemental Information 6 — The pollinator genera and plant species interactions observed at each site, pooled across three 15-minute transects walks. Site = Sampling location; Type = management type; Transect = Number of transect sampled; Date = sampling date; Visit = first, second or third visit; Plant_species = Plant species on which the insect was observed/collected; Order, Family. Genus = taxonomical classification; Individuals = Sum of the number of individuals observed/collected. [file peerj-12-16900-s006.xlsx]

## Sheet: SB_Interactions
Site	Type	Transect	Date	Visit	Plant_species	Order	Family	Genus	Individuals
Sibiu Gusterita	Natural	SB1	2021-07-01	I	Onobrychis viciifolia	Hymenoptera	Apidae	Bombus	1
Sibiu Gusterita	Natural	SB1	2021-07-01	I	Onobrychis viciifolia	Hymenoptera	Apidae	Apis	7
Sibiu Gusterita	Natural	SB1	2021-07-01	I	Astragalus onobrychis	Hymenoptera	Apidae	Bombus	2
Sibiu Gusterita	Natural	SB1	2021-07-01	I	Dorycnium herbaceum	Diptera	Syrphidae	Sphaerophoria	1
Sibiu Gusterita	Natural	SB1	2021-07-01	I	Astragalus onobrychis	Hymenoptera	Apidae	Eucera	1
Sibiu Gusterita	Natural	SB1	2021-07-01	I	Astragalus onobrychis	Hymenoptera	Apidae	Xylocopa	1
Sibiu Gusterita	Natural	SB1	2021-07-01	I	Onobrychis viciifolia	Hymenoptera	Apidae	Apis	5
Sibiu Gusterita	Natural	SB1	2021-07-01	I	Onobrychis viciifolia	Hymenoptera	Andrenidae	Andrena	1
Sibiu Gusterita	Natural	SB1	2021-07-01	I	Astragalus onobrychis	Diptera	Syrphidae	Episyrphus	1
Sibiu Gusterita	Natural	SB1	2021-07-01	I	Dorycnium herbaceum	Hymenoptera	Apidae	Apis	7
Sibiu Gusterita	Natural	SB1	2021-07-01	I	Dorycnium herbaceum	Hymenoptera	Andrenidae	Andrena	1
Sibiu Gusterita	Natural	SB1	2021-07-05	II	Astragalus onobrychis	Hymenoptera	Apidae	Xylocopa	1
Sibiu Gusterita	Natural	SB1	2021-07-05	II	Dorycnium herbaceum	Diptera	Tachinidae	Tachina	2
Sibiu Gusterita	Natural	SB1	2021-07-05	II	Dorycnium herbaceum	Diptera	Tachinidae	Tachina	3
Sibiu Gusterita	Natural	SB1	2021-07-05	II	Galium verum	Diptera	Syrphidae	Sphaerophoria	1
Sibiu Gusterita	Natural	SB1	2021-07-05	II	Medicago falcata	Diptera	Syrphidae	Sphaerophoria	1
Sibiu Gusterita	Natural	SB1	2021-07-05	II	Dorycnium herbaceum	Hymenoptera	Andrenidae	Andrena	1
Sibiu Gusterita	Natural	SB1	2021-07-05	II	Onobrychis viciifolia	Hymenoptera	Apidae	Apis	4
Sibiu Gusterita	Natural	SB1	2021-07-05	II	Astragalus onobrychis	Hymenoptera	Apidae	Bombus	1
Sibiu Gusterita	Natural	SB1	2021-07-05	II	Dorycnium herbaceum	Hymenoptera	Andrenidae	Andrena	2
Sibiu Gusterita	Natural	SB1	2021-07-05	II	Dorycnium herbaceum	Diptera	Tachinidae	Cadurciella	1
Sibiu Gusterita	Natural	SB1	2021-07-05	II	Dorycnium herbaceum	Hymenoptera	Apidae	Apis	3
Sibiu Gusterita	Natural	SB1	2021-07-05	II	Onobrychis viciifolia	Hymenoptera	Megachilidae	Osmia	2
Sibiu Gusterita	Natural	SB1	2021-07-05	II	Dorycnium herbaceum	Diptera	Syrphidae	Episyrphus	1
Sibiu Gusterita	Natural	SB1	2021-07-05	II	Dorycnium herbaceum	Diptera	Sarcophagidae	Sarcophaga	1
Sibiu Gusterita	Natural	SB1	2021-07-05	II	Dorycnium herbaceum	Diptera	Tachinidae	Tachina	1
Sibiu Gusterita	Natural	SB1	2021-07-05	II	Astragalus onobrychis	Hymenoptera	Andrenidae	Andrena	1
Sibiu Gusterita	Natural	SB1	2021-07-05	II	Vicia cracca	Hymenoptera	Apidae	Apis	1
Sibiu Gusterita	Natural	SB1	2021-07-07	III	Onobrychis viciifolia	Hymenoptera	Apidae	Anthophora	3
Sibiu Gusterita	Natural	SB1	2021-07-07	III	Dorycnium herbaceum	Hymenoptera	Apidae	Apis	17
Sibiu Gusterita	Natural	SB1	2021-07-07	III	Dorycnium herbaceum	Hymenoptera	Apidae	Apis	1
Sibiu Gusterita	Natural	SB1	2021-07-07	III	Dorycnium herbaceum	Hymenoptera	Andrenidae	Andrena	3
Sibiu Gusterita	Natural	SB1	2021-07-07	III	Dorycnium herbaceum	Hymenoptera	Andrenidae	Andrena	1
Sibiu Gusterita	Natural	SB1	2021-07-07	III	Dorycnium herbaceum	Hymenoptera	Andrenidae	Andrena	1
Sibiu Gusterita	Natural	SB1	2021-07-07	III	Astragalus onobrychis	Hymenoptera	Apidae	Eucera	1
Sibiu Gusterita	Natural	SB1	2021-07-07	III	Astragalus onobrychis	Hymenoptera	Andrenidae	Andrena	1
Sibiu Gusterita	Natural	SB1	2021-07-07	III	Dorycnium herbaceum	Diptera	Tachinidae	Tachina	1
Sibiu Gusterita	Natural	SB1	2021-07-07	III	Vicia cracca	Hymenoptera	Andrenidae	Andrena	1
Sibiu Gusterita	Natural	SB1	2021-07-07	III	Dorycnium herbaceum	Diptera	Tachinidae	Mintho	2
Sibiu Gusterita	Natural	SB1	2021-07-07	III	Dorycnium herbaceum	Diptera	Tachinidae	Tachina	1
Sibiu Gusterita	Natural	SB1	2021-07-07	III	Dorycnium herbaceum	Diptera	Syrphidae	Sphaerophoria	1
Sibiu Gusterita	Natural	SB1	2021-07-07	III	Dorycnium herbaceum	Hymenoptera	Andrenidae	Andrena	1
Sibiu Gusterita	Natural	SB1	2021-07-07	III	Dorycnium herbaceum	Hymenoptera	Andrenidae	Andrena	1
Sibiu Gusterita	Natural	SB1	2021-07-07	III	Dorycnium herbaceum	Hymenoptera	Andrenidae	Andrena	1
Sibiu Gusterita	Natural	SB1	2021-07-07	III	Dorycnium herbaceum	Hymenoptera	Andrenidae	Andrena	1
Sibiu Gusterita	Natural	SB1	2021-07-07	III	Astragalus onobrychis	Hymenoptera	Halictidae	Halictus	1
Sibiu Gusterita	Natural	SB1	2021-07-07	III	Medicago falcata	Hymenoptera	Andrenidae	Andrena	1
Sibiu Gusterita	Natural	SB1	2021-07-07	III	Dorycnium herbaceum	Diptera	Syrphidae	Sphaerophoria	1
Sibiu Gusterita	Natural	SB1	2021-07-07	III	Coronilla varia	Hymenoptera	Andrenidae	Andrena	1
Sibiu Gusterita	Natural	SB1	2021-07-07	III	Dorycnium herbaceum	Hymenoptera	Vespidae	Polistes	1
Sibiu Gusterita	Natural	SB1	2021-07-09	IV	Dorycnium herbaceum	Hymenoptera	Apidae	Apis	56
Sibiu Gusterita	Natural	SB1	2021-07-09	IV	Dorycnium herbaceum	Hymenoptera	Apidae	Apis	1
Sibiu Gusterita	Natural	SB1	2021-07-09	IV	Astragalus onobrychis	Hymenoptera	Apidae	Eucera	1
Sibiu Gusterita	Natural	SB1	2021-07-09	IV	Dorycnium herbaceum	Hymenoptera	Symphita	Symphita	1
Sibiu Gusterita	Natural	SB1	2021-07-09	IV	Vicia cracca	Hymenoptera	Apidae	Apis	2
Sibiu Gusterita	Natural	SB1	2021-07-09	IV	Salvia verticillata	Hymenoptera	Apidae	Apis	1
Sibiu Gusterita	Natural	SB1	2021-07-09	IV	Dorycnium herbaceum	Diptera	Syrphidae	Eristalis	1
Sibiu Gusterita	Natural	SB1	2021-07-09	IV	Medicago falcata	Diptera	Tachinidae	Athrycia	1
Sibiu Gusterita	Natural	SB1	2021-07-09	IV	Dorycnium herbaceum	Hymenoptera	Vespidae	Polistes	1
Sibiu Gusterita	Natural	SB1	2021-07-09	IV	Dorycnium herbaceum	Diptera	Tachinidae	Tachina	2
Sibiu Gusterita	Natural	SB1	2021-07-09	IV	Dorycnium herbaceum	Diptera	Calliphoridae	Pollenia	1
Sibiu Gusterita	Natural	SB1	2021-07-09	IV	Dorycnium herbaceum	Diptera	Syrphidae	Sphaerophoria	1
Sibiu Gusterita	Natural	SB1	2021-07-09	IV	Dorycnium herbaceum	Hymenoptera	Andrenidae	Andrena	1
Sibiu Gusterita	Natural	SB1	2021-07-09	IV	Dorycnium herbaceum	Hymenoptera	Andrenidae	Andrena	1
Sibiu Gusterita	Natural	SB1	2021-07-09	IV	Dorycnium herbaceum	Hymenoptera	Andrenidae	Andrena	1
Sibiu Gusterita	Natural	SB1	2021-07-09	IV	Onobrychis viciifolia	Hymenoptera	Andrenidae	Andrena	1
Sibiu Gusterita	Natural	SB1	2021-07-09	IV	Medicago falcata	Hymenoptera	Megachilidae	Megachile	1
Sibiu Gusterita	Natural	SB2	2021-07-01	I	Dorycnium herbaceum	Hymenoptera	Apidae	Apis	21
Sibiu Gusterita	Natural	SB2	2021-07-01	I	Onobrychis viciifolia	Hymenoptera	Apidae	Eucera	1
Sibiu Gusterita	Natural	SB2	2021-07-01	I	Knautia arvensis	Hymenoptera	Apidae	Apis	1
Sibiu Gusterita	Natural	SB2	2021-07-01	I	Astragalus onobrychis	Hymenoptera	Apidae	Eucera	2
Sibiu Gusterita	Natural	SB2	2021-07-01	I	Dorycnium herbaceum	Hymenoptera	Andrenidae	Andrena	1
Sibiu Gusterita	Natural	SB2	2021-07-01	I	Scabiosa ochroleuca	Hymenoptera	Halictidae	Lasioglossum	1
Sibiu Gusterita	Natural	SB2	2021-07-01	I	Astragalus onobrychis	Hymenoptera	Apidae	Eucera	2
Sibiu Gusterita	Natural	SB2	2021-07-01	I	Astragalus onobrychis	Hymenoptera	Apidae	Eucera	2
Sibiu Gusterita	Natural	SB2	2021-07-01	I	Dorycnium herbaceum	Hymenoptera	Vespidae	Polistes	1
Sibiu Gusterita	Natural	SB2	2021-07-01	I	Dorycnium herbaceum	Diptera	Tachinidae	Cylindromyia	1
Sibiu Gusterita	Natural	SB2	2021-07-01	I	Onobrychis viciifolia	Hymenoptera	Apidae	Apis	4
Sibiu Gusterita	Natural	SB2	2021-07-01	I	Coronilla varia	Hymenoptera	Apidae	Apis	2
Sibiu Gusterita	Natural	SB2	2021-07-01	I	Dorycnium herbaceum	Hymenoptera	Andrenidae	Andrena	1
Sibiu Gusterita	Natural	SB2	2021-07-01	I	Salvia verticillata	Hymenoptera	Apidae	Apis	1
Sibiu Gusterita	Natural	SB2	2021-07-01	I	Echium vulgare	Hymenoptera	Apidae	Apis	1
Sibiu Gusterita	Natural	SB2	2021-07-01	I	Dorycnium herbaceum	Hymenoptera	Halictidae	Lasioglossum	2
Sibiu Gusterita	Natural	SB2	2021-07-01	I	Astragalus onobrychis	Hymenoptera	Apidae	Eucera	2
Sibiu Gusterita	Natural	SB2	2021-07-05	II	Medicago falcata	Hymenoptera	Halictidae	Rophites	1
Sibiu Gusterita	Natural	SB2	2021-07-05	II	Astragalus onobrychis	Hymenoptera	Apidae	Eucera	1
Sibiu Gusterita	Natural	SB2	2021-07-05	II	Lathyrus tuberosus	Hymenoptera	Megachilidae	Megachile	1
Sibiu Gusterita	Natural	SB2	2021-07-05	II	Lotus corniculatus	Hymenoptera	Apidae	Bombus	1
Sibiu Gusterita	Natural	SB2	2021-07-05	II	Astragalus onobrychis	Hymenoptera	Apidae	Eucera	1
Sibiu Gusterita	Natural	SB2	2021-07-05	II	Echium vulgare	Hymenoptera	Apidae	Apis	1
Sibiu Gusterita	Natural	SB2	2021-07-05	II	Dorycnium herbaceum	Hymenoptera	Apidae	Apis	43
Sibiu Gusterita	Natural	SB2	2021-07-05	II	Dorycnium herbaceum	Hymenoptera	Apidae	Apis	1
Sibiu Gusterita	Natural	SB2	2021-07-05	II	Dorycnium herbaceum	Hymenoptera	Halictidae	Lasioglossum	1
Sibiu Gusterita	Natural	SB2	2021-07-05	II	Dorycnium herbaceum	Hymenoptera	Andrenidae	Andrena	1
Sibiu Gusterita	Natural	SB2	2021-07-05	II	Dorycnium herbaceum	Diptera	Tachinidae	Mintho	1
Sibiu Gusterita	Natural	SB2	2021-07-05	II	Knautia arvensis	Hymenoptera	Andrenidae	Andrena	1
Sibiu Gusterita	Natural	SB2	2021-07-05	II	Dorycnium herbaceum	Hymenoptera	Vespidae	Polistes	2
Sibiu Gusterita	Natural	SB2	2021-07-05	II	Dorycnium herbaceum	Hymenoptera	Vespidae	Polistes	1
Sibiu Gusterita	Natural	SB2	2021-07-05	II	Dorycnium herbaceum	Hymenoptera	Andrenidae	Andrena	1
Sibiu Gusterita	Natural	SB2	2021-07-05	II	Dorycnium herbaceum	Hymenoptera	Halictidae	Rophites	1
Sibiu Gusterita	Natural	SB2	2021-07-05	II	Onobrychis viciifolia	Hymenoptera	Apidae	Apis	2
Sibiu Gusterita	Natural	SB2	2021-07-05	II	Onobrychis viciifolia	Hymenoptera	Andrenidae	Andrena	1
Sibiu Gusterita	Natural	SB2	2021-07-06	III	Salvia verticillata	Hymenoptera	Apidae	Apis	1
Sibiu Gusterita	Natural	SB2	2021-07-06	III	Dorycnium herbaceum	Hymenoptera	Apidae	Apis	32
Sibiu Gusterita	Natural	SB2	2021-07-06	III	Knautia arvensis	Hymenoptera	Apidae	Apis	1
Sibiu Gusterita	Natural	SB2	2021-07-06	III	Astragalus onobrychis	Hymenoptera	Apidae	Eucera	2
Sibiu Gusterita	Natural	SB2	2021-07-06	III	Dorycnium herbaceum	Diptera	Sarcophagidae	Sarcophaga	1
Sibiu Gusterita	Natural	SB2	2021-07-06	III	Dorycnium herbaceum	Hymenoptera	Andrenidae	Andrena	1
Sibiu Gusterita	Natural	SB2	2021-07-06	III	Dorycnium herbaceum	Diptera	Sarcophagidae	Sarcophaga	1
Sibiu Gusterita	Natural	SB2	2021-07-06	III	Dorycnium herbaceum	Hymenoptera	Scoliidae	Scolia	1
Sibiu Gusterita	Natural	SB2	2021-07-06	III	Rhinanthus major	Hymenoptera	Apidae	Bombus	1
Sibiu Gusterita	Natural	SB2	2021-07-06	III	Astragalus onobrychis	Hymenoptera	Apidae	Eucera	1
Sibiu Gusterita	Natural	SB2	2021-07-06	III	Astragalus onobrychis	Hymenoptera	Apidae	Eucera	1
Sibiu Gusterita	Natural	SB2	2021-07-06	III	Lathyrus tuberosus	Diptera	Syrphidae	Sphaerophoria	1
Sibiu Gusterita	Natural	SB2	2021-07-06	III	Dorycnium herbaceum	Hymenoptera	Andrenidae	Andrena	2
Sibiu Gusterita	Natural	SB2	2021-07-06	III	Dorycnium herbaceum	Hymenoptera	Andrenidae	Andrena	1
Sibiu Gusterita	Natural	SB2	2021-07-06	III	Dorycnium herbaceum	Hymenoptera	Apidae	Apis	1
Sibiu Gusterita	Natural	SB2	2021-07-06	III	Astragalus onobrychis	Hymenoptera	Apidae	Eucera	1
Sibiu Gusterita	Natural	SB2	2021-07-06	III	Astragalus onobrychis	Hymenoptera	Apidae	Eucera	1
Sibiu Gusterita	Natural	SB2	2021-07-06	III	Lathyrus tuberosus	Hymenoptera	Apidae	Eucera	1
Sibiu Gusterita	Natural	SB3	2021-07-01	I	Tragopogon orientalis	Hymenoptera	Halictidae	Lasioglossum	2
Sibiu Gusterita	Natural	SB3	2021-07-01	I	Tragopogon orientalis	Hymenoptera	Halictidae	Lasioglossum	1
Sibiu Gusterita	Natural	SB3	2021-07-01	I	Medicago falcata	Diptera	Syrphidae	Sphaerophoria	2
Sibiu Gusterita	Natural	SB3	2021-07-01	I	Astragalus cicer	Hymenoptera	Apidae	Eucera	1
Sibiu Gusterita	Natural	SB3	2021-07-01	I	Galium mollugo/album	Diptera	Tachinidae	Zophomyia	1
Sibiu Gusterita	Natural	SB3	2021-07-01	I	Onobrychis viciifolia	Hymenoptera	Apidae	Apis	10
Sibiu Gusterita	Natural	SB3	2021-07-01	I	Astragalus onobrychis	Hymenoptera	Apidae	Eucera	2
Sibiu Gusterita	Natural	SB3	2021-07-01	I	Galium verum	Diptera	Sarcophagidae	Sarcophaga	1
Sibiu Gusterita	Natural	SB3	2021-07-01	I	Onobrychis viciifolia	Hymenoptera	Melittidae	Melitta	1
Sibiu Gusterita	Natural	SB3	2021-07-01	I	Medicago falcata	Diptera	Syrphidae	Sphaerophoria	1
Sibiu Gusterita	Natural	SB3	2021-07-01	I	Astragalus cicer	Hymenoptera	Apidae	Eucera	3
Sibiu Gusterita	Natural	SB3	2021-07-01	I	Medicago falcata	Hymenoptera	Halictidae	Rophites	3
Sibiu Gusterita	Natural	SB3	2021-07-01	I	Rhinanthus major	Diptera	Syrphidae	Sphaerophoria	1
Sibiu Gusterita	Natural	SB3	2021-07-01	I	Galium mollugo/album	Diptera	Syrphidae	Sphaerophoria	1
Sibiu Gusterita	Natural	SB3	2021-07-01	I	Onobrychis viciifolia	Hymenoptera	Melittidae	Melitta	1
Sibiu Gusterita	Natural	SB3	2021-07-01	I	Astragalus onobrychis	Hymenoptera	Andrenidae	Andrena	1
Sibiu Gusterita	Natural	SB3	2021-07-05	II	Onobrychis viciifolia	Hymenoptera	Melittidae	Melitta	1
Sibiu Gusterita	Natural	SB3	2021-07-05	II	Onobrychis viciifolia	Hymenoptera	Melittidae	Melitta	1
Sibiu Gusterita	Natural	SB3	2021-07-05	II	Onobrychis viciifolia	Hymenoptera	Apidae	Apis	17
Sibiu Gusterita	Natural	SB3	2021-07-05	II	Onobrychis viciifolia	Hymenoptera	Apidae	Apis	1
Sibiu Gusterita	Natural	SB3	2021-07-05	II	Astragalus onobrychis	Hymenoptera	Apidae	Eucera	1
Sibiu Gusterita	Natural	SB3	2021-07-05	II	Coronilla varia	Hymenoptera	Apidae	Bombus	1
Sibiu Gusterita	Natural	SB3	2021-07-05	II	Medicago falcata	Diptera	Syrphidae	Sphaerophoria	1
Sibiu Gusterita	Natural	SB3	2021-07-05	II	Medicago falcata	Hymenoptera	Apidae	Eucera	1
Sibiu Gusterita	Natural	SB3	2021-07-05	II	Coronilla varia	Hymenoptera	Apidae	Apis	2
Sibiu Gusterita	Natural	SB3	2021-07-05	II	Lathyrus tuberosus	Hymenoptera	Apidae	Eucera	1
Sibiu Gusterita	Natural	SB3	2021-07-05	II	Astragalus cicer	Hymenoptera	Apidae	Eucera	1
Sibiu Gusterita	Natural	SB3	2021-07-05	II	Coronilla varia	Hymenoptera	Andrenidae	Andrena	1
Sibiu Gusterita	Natural	SB3	2021-07-05	II	Coronilla varia	Hymenoptera	Apidae	Eucera	1
Sibiu Gusterita	Natural	SB3	2021-07-05	II	Coronilla varia	Diptera	Syrphidae	Episyrphus	1
Sibiu Gusterita	Natural	SB3	2021-07-05	II	Coronilla varia	Diptera	Syrphidae	Sphaerophoria	1
Sibiu Gusterita	Natural	SB3	2021-07-07	III	Medicago falcata	Diptera	Syrphidae	Sphaerophoria	3
Sibiu Gusterita	Natural	SB3	2021-07-07	III	Medicago falcata	Hymenoptera	Halictidae	Halictus	1
Sibiu Gusterita	Natural	SB3	2021-07-07	III	Coronilla varia	Hymenoptera	Andrenidae	Andrena	2
Sibiu Gusterita	Natural	SB3	2021-07-07	III	Astragalus cicer	Hymenoptera	Apidae	Eucera	1
Sibiu Gusterita	Natural	SB3	2021-07-07	III	Onobrychis viciifolia	Hymenoptera	Apidae	Apis	9
Sibiu Gusterita	Natural	SB3	2021-07-07	III	Medicago falcata	Hymenoptera	Halictidae	Rophites	1
Sibiu Gusterita	Natural	SB3	2021-07-07	III	Medicago falcata	Hymenoptera	Halictidae	Rophites	1
Sibiu Gusterita	Natural	SB3	2021-07-07	III	Coronilla varia	Hymenoptera	Apidae	Apis	1
Sibiu Gusterita	Natural	SB3	2021-07-07	III	Onobrychis viciifolia	Hymenoptera	Apidae	Anthophora	1
Sibiu Gusterita	Natural	SB3	2021-07-07	III	Onobrychis viciifolia	Hymenoptera	Apidae	Eucera	1
Sibiu Gusterita	Natural	SB3	2021-07-07	III	Coronilla varia	Hymenoptera	Andrenidae	Andrena	1
Sibiu Gusterita	Natural	SB3	2021-07-07	III	Onobrychis viciifolia	Hymenoptera	Apidae	Eucera	1
Sibiu Gusterita	Natural	SB3	2021-07-07	III	Onobrychis viciifolia	Hymenoptera	Melittidae	Melitta	1
Sibiu Gusterita	Natural	SB3	2021-07-07	III	Coronilla varia	Diptera	Syrphidae	Sphaerophoria	1
Sibiu Gusterita	Natural	SB3	2021-07-07	III	Astragalus cicer	Hymenoptera	Apidae	Eucera	1
Sibiu Gusterita	Natural	SB3	2021-07-07	III	Medicago falcata	Hymenoptera	Halictidae	Halictus	2
Sibiu Gusterita	Natural	SB3	2021-07-07	III	Medicago falcata	Hymenoptera	Andrenidae	Andrena	1
Sibiu Gusterita	Natural	SB3	2021-07-07	III	Astragalus cicer	Hymenoptera	Apidae	Bombus	1
Sibiu Gusterita	Natural	SB4	2021-07-01	I	Tragopogon orientalis	Diptera	Syrphidae	Episyrphus	1
Sibiu Gusterita	Natural	SB4	2021-07-01	I	Tragopogon orientalis	Diptera	Syrphidae	Sphaerophoria	1
Sibiu Gusterita	Natural	SB4	2021-07-01	I	Cichorium intybus	Diptera	Syrphidae	Sphaerophoria	1
Sibiu Gusterita	Natural	SB4	2021-07-01	I	Cichorium intybus	Diptera	Syrphidae	Sphaerophoria	1
Sibiu Gusterita	Natural	SB4	2021-07-01	I	Cichorium intybus	Diptera	Syrphidae	Sphaerophoria	1
Sibiu Gusterita	Natural	SB4	2021-07-01	I	Erigeron annuus	Diptera	Syrphidae	Scaeva	1
Sibiu Gusterita	Natural	SB4	2021-07-01	I	Erigeron annuus	Diptera	Syrphidae	Sphaerophoria	1
Sibiu Gusterita	Natural	SB4	2021-07-01	I	Agrimonia eupatoria	Diptera	Syrphidae	Sphaerophoria	1
Sibiu Gusterita	Natural	SB4	2021-07-01	I	Medicago sativa	Diptera	Syrphidae	Sphaerophoria	1
Sibiu Gusterita	Natural	SB4	2021-07-01	I	Cichorium intybus	Diptera	Syrphidae	Sphaerophoria	4
Sibiu Gusterita	Natural	SB4	2021-07-01	I	Medicago sativa	Diptera	Syrphidae	Sphaerophoria	2
Sibiu Gusterita	Natural	SB4	2021-07-01	I	Medicago sativa	Hymenoptera	Apidae	Eucera	1
Sibiu Gusterita	Natural	SB4	2021-07-01	I	Cichorium intybus	Hymenoptera	Apidae	Apis	1
Sibiu Gusterita	Natural	SB4	2021-07-01	I	Tragopogon orientalis	Diptera	Syrphidae	Eristalis	2
Sibiu Gusterita	Natural	SB4	2021-07-01	I	Cichorium intybus	Hymenoptera	Megachilidae	Hoplitis	1
Sibiu Gusterita	Natural	SB4	2021-07-01	I	Medicago sativa	Hymenoptera	Apidae	Apis	1
Sibiu Gusterita	Natural	SB4	2021-07-01	I	Onobrychis viciifolia	Hymenoptera	Apidae	Apis	1
Sibiu Gusterita	Natural	SB4	2021-07-01	I	Salvia nemorosa	Hymenoptera	Apidae	Apis	1
Sibiu Gusterita	Natural	SB4	2021-07-01	I	Salvia nemorosa	Hymenoptera	Apidae	Bombus	1
Sibiu Gusterita	Natural	SB4	2021-07-01	I	Trifolium pratense	Hymenoptera	Apidae	Eucera	1
Sibiu Gusterita	Natural	SB4	2021-07-05	II	Lathyrus tuberosus	Hymenoptera	Apidae	Bombus	1
Sibiu Gusterita	Natural	SB4	2021-07-05	II	Medicago falcata	Hymenoptera	Apidae	Apis	1
Sibiu Gusterita	Natural	SB4	2021-07-05	II	Coronilla varia	Hymenoptera	Apidae	Apis	7
Sibiu Gusterita	Natural	SB4	2021-07-05	II	Cichorium intybus	Hymenoptera	Andrenidae	Andrena	1
Sibiu Gusterita	Natural	SB4	2021-07-05	II	Erigeron annuus	Diptera	Syrphidae	Sphaerophoria	4
Sibiu Gusterita	Natural	SB4	2021-07-05	II	Cichorium intybus	Hymenoptera	Andrenidae	Andrena	1
Sibiu Gusterita	Natural	SB4	2021-07-05	II	Cichorium intybus	Hymenoptera	Halictidae	Halictus	1
Sibiu Gusterita	Natural	SB4	2021-07-05	II	Coronilla varia	Hymenoptera	Apidae	Bombus	1
Sibiu Gusterita	Natural	SB4	2021-07-05	II	Coronilla varia	Hymenoptera	Apidae	Bombus	1
Sibiu Gusterita	Natural	SB4	2021-07-05	II	Salvia nemorosa	Hymenoptera	Apidae	Apis	5
Sibiu Gusterita	Natural	SB4	2021-07-05	II	Erigeron annuus	Diptera	Syrphidae	Eristalis	1
Sibiu Gusterita	Natural	SB4	2021-07-05	II	Erigeron annuus	Hymenoptera	Andrenidae	Andrena	1
Sibiu Gusterita	Natural	SB4	2021-07-05	II	Erigeron annuus	Diptera	Syrphidae	Eristalis	1
Sibiu Gusterita	Natural	SB4	2021-07-05	II	Cichorium intybus	Hymenoptera	Andrenidae	Andrena	1
Sibiu Gusterita	Natural	SB4	2021-07-05	II	Erigeron annuus	Diptera	Sarcophagidae	Sarcophaga	1
Sibiu Gusterita	Natural	SB4	2021-07-05	II	Lathyrus tuberosus	Diptera	Bombyliidae	Hemipenthes	1
Sibiu Gusterita	Natural	SB4	2021-07-05	II	Medicago sativa	Hymenoptera	Halictidae	Halictus	1
Sibiu Gusterita	Natural	SB4	2021-07-07	III	Erigeron annuus	Hymenoptera	Halictidae	Halictus	1
Sibiu Gusterita	Natural	SB4	2021-07-07	III	Coronilla varia	Hymenoptera	Apidae	Apis	1
Sibiu Gusterita	Natural	SB4	2021-07-07	III	Medicago sativa	Hymenoptera	Apidae	Apis	1
Sibiu Gusterita	Natural	SB4	2021-07-07	III	Coronilla varia	Hymenoptera	Apidae	Apis	4
Sibiu Gusterita	Natural	SB4	2021-07-07	III	Medicago sativa	Hymenoptera	Apidae	Eucera	1
Sibiu Gusterita	Natural	SB4	2021-07-07	III	Coronilla varia	Hymenoptera	Apidae	Eucera	1
Sibiu Gusterita	Natural	SB4	2021-07-07	III	Coronilla varia	Hymenoptera	Andrenidae	Andrena	1
Sibiu Gusterita	Natural	SB4	2021-07-07	III	Coronilla varia	Hymenoptera	Halictidae	Halictus	1
Sibiu Gusterita	Natural	SB4	2021-07-07	III	Salvia nemorosa	Hymenoptera	Apidae	Apis	5
Sibiu Gusterita	Natural	SB4	2021-07-07	III	Coronilla varia	Hymenoptera	Apidae	Bombus	1
Sibiu Gusterita	Natural	SB4	2021-07-07	III	Onobrychis viciifolia	Hymenoptera	Apidae	Apis	1
Sibiu Gusterita	Natural	SB4	2021-07-07	III	Medicago falcata	Hymenoptera	Halictidae	Rophites	1
Sibiu Gusterita	Natural	SB4	2021-07-07	III	Medicago sativa	Hymenoptera	Andrenidae	Andrena	1
Sibiu Gusterita	Natural	SB4	2021-07-07	III	Medicago sativa	Hymenoptera	Halictidae	Halictus	1
Sibiu Gusterita	Natural	SB5	2021-06-30	I	Astragalus onobrychis	Hymenoptera	Apidae	Eucera	1
Sibiu Gusterita	Natural	SB5	2021-06-30	I	Knautia arvensis	Hymenoptera	Apidae	Apis	1
Sibiu Gusterita	Natural	SB5	2021-06-30	I	Dorycnium herbaceum	Hymenoptera	Apidae	Apis	10
Sibiu Gusterita	Natural	SB5	2021-06-30	I	Dorycnium herbaceum	Hymenoptera	Melittidae	Melitta	1
Sibiu Gusterita	Natural	SB5	2021-06-30	I	Dorycnium herbaceum	Hymenoptera	Eumenidae	Eumenidae	1
Sibiu Gusterita	Natural	SB5	2021-06-30	I	Onobrychis viciifolia	Hymenoptera	Apidae	Apis	11
Sibiu Gusterita	Natural	SB5	2021-06-30	I	Dorycnium herbaceum	Hymenoptera	Andrenidae	Andrena	1
Sibiu Gusterita	Natural	SB5	2021-06-30	I	Dorycnium herbaceum	Hymenoptera	Halictidae	Halictus	1
Sibiu Gusterita	Natural	SB5	2021-06-30	I	Trifolium pratense	Hymenoptera	Apidae	Apis	1
Sibiu Gusterita	Natural	SB5	2021-06-30	I	Onobrychis viciifolia	Diptera	Syrphidae	Episyrphus	1
Sibiu Gusterita	Natural	SB5	2021-06-30	I	Onobrychis viciifolia	Hymenoptera	Halictidae	Halictus	1
Sibiu Gusterita	Natural	SB5	2021-06-30	I	Onobrychis viciifolia	Hymenoptera	Megachilidae	Megachile	1
Sibiu Gusterita	Natural	SB5	2021-06-30	I	Onobrychis viciifolia	Hymenoptera	Apidae	Apis	1
Sibiu Gusterita	Natural	SB5	2021-06-30	I	Teucrium chamaedrys	Hymenoptera	Apidae	Apis	1
Sibiu Gusterita	Natural	SB5	2021-06-30	I	Astragalus onobrychis	Hymenoptera	Apidae	Eucera	2
Sibiu Gusterita	Natural	SB5	2021-06-30	I	Astragalus onobrychis	Hymenoptera	Apidae	Bombus	1
Sibiu Gusterita	Natural	SB5	2021-06-30	I	Teucrium chamaedrys	Hymenoptera	Megachilidae	Anthidium	2
Sibiu Gusterita	Natural	SB5	2021-06-30	I	Dorycnium herbaceum	Hymenoptera	Crabronidae	Crabronidae	1
Sibiu Gusterita	Natural	SB5	2021-06-30	I	Dorycnium herbaceum	Hymenoptera	Apidae	Apis	7
Sibiu Gusterita	Natural	SB5	2021-06-30	I	Astragalus cicer	Hymenoptera	Apidae	Bombus	1
Sibiu Gusterita	Natural	SB5	2021-06-30	I	Coronilla varia	Hymenoptera	Megachilidae	Megachile	1
Sibiu Gusterita	Natural	SB5	2021-07-05	II	Lotus corniculatus	Hymenoptera	Megachilidae	Megachile	1
Sibiu Gusterita	Natural	SB5	2021-07-05	II	Coronilla varia	Hymenoptera	Megachilidae	Hoplitis	1
Sibiu Gusterita	Natural	SB5	2021-07-05	II	Coronilla varia	Hymenoptera	Apidae	Apis	1
Sibiu Gusterita	Natural	SB5	2021-07-05	II	Dorycnium herbaceum	Hymenoptera	Apidae	Apis	23
Sibiu Gusterita	Natural	SB5	2021-07-05	II	Dorycnium herbaceum	Hymenoptera	Andrenidae	Andrena	1
Sibiu Gusterita	Natural	SB5	2021-07-05	II	Dorycnium herbaceum	Hymenoptera	Andrenidae	Andrena	1
Sibiu Gusterita	Natural	SB5	2021-07-05	II	Dorycnium herbaceum	Hymenoptera	Vespidae	Polistes	1
Sibiu Gusterita	Natural	SB5	2021-07-05	II	Teucrium chamaedrys	Hymenoptera	Apidae	Bombus	1
Sibiu Gusterita	Natural	SB5	2021-07-05	II	Lotus corniculatus	Hymenoptera	Megachilidae	Anthidium	1
Sibiu Gusterita	Natural	SB5	2021-07-05	II	Onobrychis viciifolia	Hymenoptera	Apidae	Apis	12
Sibiu Gusterita	Natural	SB5	2021-07-05	II	Onobrychis viciifolia	Hymenoptera	Apidae	Anthophora	1
Sibiu Gusterita	Natural	SB5	2021-07-05	II	Onobrychis viciifolia	Hymenoptera	Andrenidae	Andrena	1
Sibiu Gusterita	Natural	SB5	2021-07-05	II	Onobrychis viciifolia	Hymenoptera	Megachilidae	Megachile	1
Sibiu Gusterita	Natural	SB5	2021-07-05	II	Teucrium chamaedrys	Hymenoptera	Apidae	Bombus	1
Sibiu Gusterita	Natural	SB5	2021-07-05	II	Teucrium chamaedrys	Hymenoptera	Andrenidae	Andrena	1
Sibiu Gusterita	Natural	SB5	2021-07-05	II	Teucrium chamaedrys	Hymenoptera	Apidae	Apis	2
Sibiu Gusterita	Natural	SB5	2021-07-05	II	Dorycnium herbaceum	Hymenoptera	Sphaecidae	Sphaecodes	1
Sibiu Gusterita	Natural	SB5	2021-07-05	II	Medicago falcata	Diptera	Syrphidae	Sphaerophoria	1
Sibiu Gusterita	Natural	SB5	2021-07-05	II	Medicago falcata	Hymenoptera	Andrenidae	Andrena	1
Sibiu Gusterita	Natural	SB5	2021-07-05	II	Coronilla varia	Hymenoptera	Apidae	Apis	1
Sibiu Gusterita	Natural	SB5	2021-07-05	II	Knautia arvensis	Diptera	Conopidae	Myopa	1
Sibiu Gusterita	Natural	SB5	2021-07-05	II	Dorycnium herbaceum	Hymenoptera	Crabronidae	Crabronidae	1
Sibiu Gusterita	Natural	SB5	2021-07-07	III	Onobrychis viciifolia	Hymenoptera	Apidae	Apis	5
Sibiu Gusterita	Natural	SB5	2021-07-07	III	Medicago falcata	Hymenoptera	Halictidae	Halictus	1
Sibiu Gusterita	Natural	SB5	2021-07-07	III	Onobrychis viciifolia	Hymenoptera	Megachilidae	Megachile	1
Sibiu Gusterita	Natural	SB5	2021-07-07	III	Dorycnium herbaceum	Hymenoptera	Apidae	Apis	9
Sibiu Gusterita	Natural	SB5	2021-07-07	III	Medicago falcata	Hymenoptera	Andrenidae	Andrena	1
Sibiu Gusterita	Natural	SB5	2021-07-07	III	Lotus corniculatus	Hymenoptera	Apidae	Bombus	1
Sibiu Gusterita	Natural	SB5	2021-07-07	III	Hypericum perforatum	Hymenoptera	Colletidae	Hyaleus	1
Sibiu Gusterita	Natural	SB5	2021-07-07	III	Dorycnium herbaceum	Hymenoptera	Crabronidae	Crabronidae	1
Sibiu Gusterita	Natural	SB5	2021-07-07	III	Dorycnium herbaceum	Diptera	Syrphidae	Sphaerophoria	1
Sibiu Gusterita	Natural	SB5	2021-07-07	III	Astragalus cicer	Hymenoptera	Apidae	Eucera	1
Sibiu Gusterita	Natural	SB5	2021-07-07	III	Coronilla varia	Hymenoptera	Apidae	Eucera	1
Sibiu Gusterita	Natural	SB5	2021-07-07	III	Astragalus cicer	Hymenoptera	Apidae	Eucera	1
Sibiu Gusterita	Natural	SB5	2021-07-07	III	Medicago falcata	Hymenoptera	Halictidae	Rophites	2
Sibiu Gusterita	Natural	SB5	2021-07-07	III	Dorycnium herbaceum	Diptera	Tachinidae	Tachina	1
Sibiu Gusterita	Natural	SB5	2021-07-07	III	Dorycnium herbaceum	Hymenoptera	Apidae	Apis	4
Sibiu Gusterita	Natural	SB5	2021-07-07	III	Onobrychis viciifolia	Hymenoptera	Halictidae	Halictus	1
Sibiu Gusterita	Natural	SB5	2021-07-07	III	Cichorium intybus	Hymenoptera	Halictidae	Systropha	1
Sibiu Gusterita	Natural	SB5	2021-07-07	III	Onobrychis viciifolia	Hymenoptera	Apidae	Apis	2
Sibiu Gusterita	Natural	SB5	2021-07-07	III	Onobrychis viciifolia	Hymenoptera	Colletidae	Colletes	1
Sibiu Gusterita	Pasture	SB6	2021-06-30	I	Trifolium campestre	Hymenoptera	Apidae	Apis	6
Sibiu Gusterita	Pasture	SB6	2021-06-30	I	Achillea millefolium	Hymenoptera	Crabronidae	Crabronidae	1
Sibiu Gusterita	Pasture	SB6	2021-06-30	I	Helianthemum nummularium	Hymenoptera	Apidae	Apis	3
Sibiu Gusterita	Pasture	SB6	2021-06-30	I	Trifolium campestre	Diptera	Syrphidae	Sphaerophoria	1
Sibiu Gusterita	Pasture	SB6	2021-06-30	I	Trifolium campestre	Hymenoptera	Halictidae	Lasioglossum	1
Sibiu Gusterita	Pasture	SB6	2021-06-30	I	Dianthus carthusianorum	Diptera	Bombyliidae	Bombylius	1
Sibiu Gusterita	Pasture	SB6	2021-06-30	I	Trifolium campestre	Hymenoptera	Halictidae	Lasioglossum	1
Sibiu Gusterita	Pasture	SB6	2021-07-05	II	Achillea millefolium	Diptera	Tachinidae	Bithia	1
Sibiu Gusterita	Pasture	SB6	2021-07-05	II	Achillea millefolium	Hymenoptera	Halictidae	Halictus	1
Sibiu Gusterita	Pasture	SB6	2021-07-05	II	Achillea millefolium	Hymenoptera	Halictidae	Lasioglossum	1
Sibiu Gusterita	Pasture	SB6	2021-07-05	II	Achillea millefolium	Hymenoptera	Halictidae	Halictus	1
Sibiu Gusterita	Pasture	SB6	2021-07-05	II	Achillea millefolium	Hymenoptera	Andrenidae	Andrena	1
Sibiu Gusterita	Pasture	SB6	2021-07-07	III	Helianthemum nummularium	Hymenoptera	Apidae	Apis	2
Sibiu Gusterita	Pasture	SB6	2021-07-07	III	Helianthemum nummularium	Hymenoptera	Halictidae	Lasioglossum	1
Sibiu Gusterita	Pasture	SB6	2021-07-07	III	Teucrium chamaedrys	Hymenoptera	Halictidae	Lasioglossum	1
Sibiu Gusterita	Pasture	SB6	2021-07-07	III	Helianthemum nummularium	Hymenoptera	Crabronidae	Crabronidae	1
Sibiu Gusterita	Pasture	SB6	2021-07-07	III	Leontodon hispidus	Diptera	Syrphidae	Sphaerophoria	1
Sibiu Gusterita	Pasture	SB6	2021-07-07	III	Trifolium arvense	Hymenoptera	Andrenidae	Andrena	1
Sibiu Gusterita	Pasture	SB6	2021-07-07	III	Trifolium campestre	Diptera	Syrphidae	Sphaerophoria	2
Sibiu Gusterita	Pasture	SB6	2021-07-07	III	Asperula cynanchica	Hymenoptera	Halictidae	Lasioglossum	1
Sibiu Gusterita	Pasture	SB6	2021-07-07	III	Trifolium campestre	Hymenoptera	Apidae	Apis	1
Sibiu Gusterita	Pasture	SB6	2021-07-07	III	Euphrasia minima	Diptera	Syrphidae	Sphaerophoria	1
Sibiu Gusterita	Pasture	SB6	2021-07-07	III	Trifolium campestre	Hymenoptera	Andrenidae	Andrena	1
Sibiu Gusterita	Pasture	SB6	2021-07-07	III	Trifolium campestre	Hymenoptera	Halictidae	Lasioglossum	1
Sibiu Gusterita	Pasture	SB6	2021-07-07	III	Helianthemum nummularium	Hymenoptera	Halictidae	Lasioglossum	1
Sibiu Gusterita	Pasture	SB6	2021-07-07	III	Helianthemum nummularium	Diptera	Syrphidae	Sphaerophoria	1
Sibiu Gusterita	Pasture	SB7	2021-06-30	I	Helianthemum nummularium	Hymenoptera	Apidae	Apis	18
Sibiu Gusterita	Pasture	SB7	2021-06-30	I	Asperula cynanchica	Diptera	Syrphidae	Sphaerophoria	1
Sibiu Gusterita	Pasture	SB7	2021-06-30	I	Asperula cynanchica	Diptera	Syrphidae	Sphaerophoria	1
Sibiu Gusterita	Pasture	SB7	2021-06-30	I	Medicago lupulina	Diptera	Syrphidae	Chrysotoxum	1
Sibiu Gusterita	Pasture	SB7	2021-06-30	I	Plantago media	Diptera	Syrphidae	Episyrphus	1
Sibiu Gusterita	Pasture	SB7	2021-06-30	I	Plantago media	Diptera	Syrphidae	Sphaerophoria	1
Sibiu Gusterita	Pasture	SB7	2021-06-30	I	Medicago falcata	Diptera	Syrphidae	Sphaerophoria	1
Sibiu Gusterita	Pasture	SB7	2021-06-30	I	Onobrychis viciifolia	Diptera	Syrphidae	Paragus	1
Sibiu Gusterita	Pasture	SB7	2021-06-30	I	Astragalus onobrychis	Hymenoptera	Apidae	Apis	2
Sibiu Gusterita	Pasture	SB7	2021-06-30	I	Helianthemum nummularium	Diptera	Syrphidae	Sphaerophoria	1
Sibiu Gusterita	Pasture	SB7	2021-06-30	I	Astragalus onobrychis	Hymenoptera	Halictidae	Halictus	1
Sibiu Gusterita	Pasture	SB7	2021-06-30	I	Dianthus carthusianorum	Diptera	Bombyliidae	Bombylius	1
Sibiu Gusterita	Pasture	SB7	2021-06-30	I	Astragalus onobrychis	Hymenoptera	Andrenidae	Andrena	1
Sibiu Gusterita	Pasture	SB7	2021-06-30	I	Onobrychis viciifolia	Hymenoptera	Apidae	Apis	3
Sibiu Gusterita	Pasture	SB7	2021-07-05	II	Onobrychis viciifolia	Hymenoptera	Apidae	Apis	1
Sibiu Gusterita	Pasture	SB7	2021-07-05	II	Achillea millefolium	Diptera	Syrphidae	Sphaerophoria	1
Sibiu Gusterita	Pasture	SB7	2021-07-05	II	Campanula sibirica	Hymenoptera	Andrenidae	Andrena	1
Sibiu Gusterita	Pasture	SB7	2021-07-05	II	Thymus sp.	Diptera	Syrphidae	Sphaerophoria	2
Sibiu Gusterita	Pasture	SB7	2021-07-05	II	Onobrychis viciifolia	Hymenoptera	Andrenidae	Andrena	1
Sibiu Gusterita	Pasture	SB7	2021-07-05	II	Achillea millefolium	Diptera	Bombyliidae	Lomatia	1
Sibiu Gusterita	Pasture	SB7	2021-07-05	II	Achillea millefolium	Hymenoptera	Scoliidae	Scolia	2
Sibiu Gusterita	Pasture	SB7	2021-07-05	II	Teucrium chamaedrys	Diptera	Bombyliidae	Bombylius	1
Sibiu Gusterita	Pasture	SB7	2021-07-05	II	Onobrychis viciifolia	Hymenoptera	Melittidae	Melitta	1
Sibiu Gusterita	Pasture	SB7	2021-07-07	III	Helianthemum nummularium	Diptera	Syrphidae	Syrphus	1
Sibiu Gusterita	Pasture	SB7	2021-07-07	III	Plantago media	Diptera	Syrphidae	Syrphus	1
Sibiu Gusterita	Pasture	SB7	2021-07-07	III	Helianthemum nummularium	Hymenoptera	Apidae	Apis	3
Sibiu Gusterita	Pasture	SB7	2021-07-07	III	Teucrium chamaedrys	Hymenoptera	Halictidae	Lasioglossum	1
Sibiu Gusterita	Pasture	SB7	2021-07-07	III	Campanula sibirica	Hymenoptera	Andrenidae	Andrena	1
Sibiu Gusterita	Pasture	SB7	2021-07-07	III	Campanula sibirica	Hymenoptera	Megachilidae	Hoplitis	1
Sibiu Gusterita	Pasture	SB7	2021-07-07	III	Clinopodium acinos	Hymenoptera	Apidae	Anthophora	1
Sibiu Gusterita	Pasture	SB7	2021-07-07	III	Trifolium repens	Hymenoptera	Andrenidae	Andrena	1
Sibiu Gusterita	Pasture	SB7	2021-07-07	III	Asperula cynanchica	Diptera	Syrphidae	Sphaerophoria	1
Sibiu Gusterita	Pasture	SB7	2021-07-07	III	Asperula cynanchica	Hymenoptera	Halictidae	Lasioglossum	1
Sibiu Gusterita	Pasture	SB7	2021-07-07	III	Onobrychis viciifolia	Hymenoptera	Andrenidae	Andrena	1
Sibiu Gusterita	Pasture	SB8	2021-06-30	I	Asperula cynanchica	Diptera	Syrphidae	Sphaerophoria	1
Sibiu Gusterita	Pasture	SB8	2021-06-30	I	Euphrasia minima	Diptera	Syrphidae	Sphaerophoria	1
Sibiu Gusterita	Pasture	SB8	2021-06-30	I	Stellaria media	Diptera	Syrphidae	Sphaerophoria	1
Sibiu Gusterita	Pasture	SB8	2021-06-30	I	Trifolium campestre	Hymenoptera	Apidae	Apis	3
Sibiu Gusterita	Pasture	SB8	2021-06-30	I	Lotus corniculatus	Diptera	Conopidae	Myopa	1
Sibiu Gusterita	Pasture	SB8	2021-06-30	I	Trifolium pratense	Hymenoptera	Halictidae	Lasioglossum	1
Sibiu Gusterita	Pasture	SB8	2021-06-30	I	Linum catharticum	Diptera	Syrphidae	Sphaerophoria	1
Sibiu Gusterita	Pasture	SB8	2021-06-30	I	Trifolium pratense	Hymenoptera	Halictidae	Lasioglossum	1
Sibiu Gusterita	Pasture	SB8	2021-07-05	II	Trifolium campestre	Hymenoptera	Apidae	Apis	1
Sibiu Gusterita	Pasture	SB8	2021-07-05	II	Stellaria graminea	Diptera	Syrphidae	Sphaerophoria	1
Sibiu Gusterita	Pasture	SB8	2021-07-05	II	Trifolium pratense	Hymenoptera	Halictidae	Lasioglossum	1
Sibiu Gusterita	Pasture	SB8	2021-07-07	III	Hypochaeris radicata	Hymenoptera	Halictidae	Lasioglossum	1
Sibiu Gusterita	Pasture	SB8	2021-07-07	III	Hypochaeris radicata	Hymenoptera	Halictidae	Lasioglossum	1
Sibiu Gusterita	Pasture	SB8	2021-07-07	III	Asperula cynanchica	Diptera	Syrphidae	Sphaerophoria	1
Sibiu Gusterita	Pasture	SB8	2021-07-07	III	Trifolium pratense	Hymenoptera	Halictidae	Lasioglossum	1
Sibiu Gusterita	Pasture	SB8	2021-07-07	III	Trifolium pratense	Hymenoptera	Andrenidae	Andrena	1
Sibiu Gusterita	Pasture	SB8	2021-07-07	III	Trifolium repens	Diptera	Syrphidae	Sphaerophoria	1
Sibiu Gusterita	Pasture	SB8	2021-07-07	III	Helianthemum nummularium	Hymenoptera	Apidae	Apis	4
Sibiu Gusterita	Pasture	SB8	2021-07-07	III	Helianthemum nummularium	Hymenoptera	Apidae	Apis	1
Sibiu Gusterita	Pasture	SB8	2021-07-07	III	Hypochaeris radicata	Diptera	Syrphidae	Sphaerophoria	1
Sibiu Gusterita	Pasture	SB8	2021-07-07	III	Lotus corniculatus	Diptera	Syrphidae	Sphaerophoria	1
Sibiu Gusterita	Pasture	SB8	2021-07-07	III	Trifolium campestre	Hymenoptera	Andrenidae	Andrena	1
Sibiu Gusterita	Pasture	SB8	2021-07-07	III	Helianthemum nummularium	Diptera	Syrphidae	Sphaerophoria	1
Sibiu Gusterita	Pasture	SB8	2021-07-07	III	Helianthemum nummularium	Diptera	Syrphidae	Sphaerophoria	1
Sibiu Gusterita	Pasture	SB8	2021-07-07	III	Helianthemum nummularium	Diptera	Syrphidae	Sphaerophoria	1
Sibiu Gusterita	Pasture	SB8	2021-07-07	III	Polygala vulgaris	Diptera	Syrphidae	Sphaerophoria	1
Sibiu Gusterita	Pasture	SB8	2021-07-07	III	Euphrasia minima	Diptera	Syrphidae	Sphaerophoria	1
Sibiu Gusterita	Pasture	SB9	2021-06-30	I	Stellaria graminea	Diptera	Syrphidae	Sphaerophoria	1
Sibiu Gusterita	Pasture	SB9	2021-06-30	I	Carduus nutans	Hymenoptera	Halictidae	Lasioglossum	1
Sibiu Gusterita	Pasture	SB9	2021-06-30	I	Thymus sp.	Diptera	Syrphidae	Sphaerophoria	1
Sibiu Gusterita	Pasture	SB9	2021-06-30	I	Potentilla argentea	Diptera	Syrphidae	Sphaerophoria	1
Sibiu Gusterita	Pasture	SB9	2021-06-30	I	Stellaria graminea	Diptera	Syrphidae	Sphaerophoria	1
Sibiu Gusterita	Pasture	SB9	2021-06-30	I	Carduus nutans	Hymenoptera	Apidae	Apis	1
Sibiu Gusterita	Pasture	SB9	2021-06-30	I	Trifolium pratense	Hymenoptera	Andrenidae	Andrena	1
Sibiu Gusterita	Pasture	SB9	2021-07-06	II	Thymus sp.	Diptera	Syrphidae	Sphaerophoria	1
Sibiu Gusterita	Pasture	SB9	2021-07-06	II	Thymus sp.	Diptera	Syrphidae	Sphaerophoria	1
Sibiu Gusterita	Pasture	SB9	2021-07-06	II	Thymus sp.	Diptera	Syrphidae	Sphaerophoria	1
Sibiu Gusterita	Pasture	SB9	2021-07-06	II	Trifolium pratense	Hymenoptera	Halictidae	Lasioglossum	1
Sibiu Gusterita	Pasture	SB9	2021-07-06	II	Trifolium pratense	Hymenoptera	Halictidae	Lasioglossum	1
Sibiu Gusterita	Pasture	SB9	2021-07-06	II	Thymus sp.	Diptera	Bombyliidae	Bombylius	1
Sibiu Gusterita	Pasture	SB9	2021-07-06	II	Carduus nutans	Hymenoptera	Andrenidae	Andrena	1
Sibiu Gusterita	Pasture	SB9	2021-07-06	II	Stellaria graminea	Diptera	Syrphidae	Sphaerophoria	2
Sibiu Gusterita	Pasture	SB9	2021-07-06	II	Stellaria graminea	Diptera	Syrphidae	Sphaerophoria	1
Sibiu Gusterita	Pasture	SB9	2021-07-06	II	Trifolium pratense	Diptera	Syrphidae	Sphaerophoria	1
Sibiu Gusterita	Pasture	SB9	2021-07-06	II	Lotus corniculatus	Hymenoptera	Halictidae	Lasioglossum	1
Sibiu Gusterita	Pasture	SB9	2021-07-07	III	Carduus nutans	Hymenoptera	Halictidae	Lasioglossum	1
Sibiu Gusterita	Pasture	SB9	2021-07-07	III	Hypochaeris radicata	Hymenoptera	Halictidae	Lasioglossum	2
Sibiu Gusterita	Pasture	SB9	2021-07-07	III	Hypochaeris radicata	Hymenoptera	Halictidae	Lasioglossum	1
Sibiu Gusterita	Pasture	SB9	2021-07-07	III	Hypochaeris radicata	Diptera	Syrphidae	Sphaerophoria	1
Sibiu Gusterita	Pasture	SB9	2021-07-07	III	Trifolium pratense	Hymenoptera	Halictidae	Lasioglossum	1
Sibiu Gusterita	Pasture	SB9	2021-07-07	III	Plantago media	Diptera	Syrphidae	Sphaerophoria	2
Sibiu Gusterita	Pasture	SB9	2021-07-07	III	Achillea millefolium	Diptera	Syrphidae	Sphaerophoria	1
Sibiu Gusterita	Pasture	SB9	2021-07-07	III	Hypochaeris radicata	Hymenoptera	Halictidae	Lasioglossum	1
Sibiu Gusterita	Pasture	SB9	2021-07-07	III	Plantago lanceolata	Diptera	Syrphidae	Sphaerophoria	2
Sibiu Gusterita	Pasture	SB9	2021-07-07	III	Thymus sp.	Diptera	Syrphidae	Sphaerophoria	1
Sibiu Gusterita	Pasture	SB9	2021-07-07	III	Thymus sp.	Hymenoptera	Halictidae	Halictus	1
Sibiu Gusterita	Pasture	SB10	2021-06-30	I	Carduus acanthoides	Hymenoptera	Apidae	Apis	11
Sibiu Gusterita	Pasture	SB10	2021-06-30	I	Carduus acanthoides	Hymenoptera	Halictidae	Lasioglossum	1
Sibiu Gusterita	Pasture	SB10	2021-06-30	I	Achillea millefolium	Diptera	Syrphidae	Sphaerophoria	1
Sibiu Gusterita	Pasture	SB10	2021-06-30	I	Carduus nutans	Hymenoptera	Halictidae	Halictus	1
Sibiu Gusterita	Pasture	SB10	2021-06-30	I	Carduus nutans	Hymenoptera	Halictidae	Lasioglossum	1
Sibiu Gusterita	Pasture	SB10	2021-06-30	I	Carduus nutans	Diptera	Syrphidae	Sphaerophoria	1
Sibiu Gusterita	Pasture	SB10	2021-06-30	I	Carduus nutans	Hymenoptera	Halictidae	Halictus	1
Sibiu Gusterita	Pasture	SB10	2021-06-30	I	Carduus nutans	Hymenoptera	Halictidae	Lasioglossum	1
Sibiu Gusterita	Pasture	SB10	2021-06-30	I	Carduus nutans	Hymenoptera	Halictidae	Lasioglossum	3
Sibiu Gusterita	Pasture	SB10	2021-06-30	I	Carduus nutans	Hymenoptera	Megachilidae	Megachile	1
Sibiu Gusterita	Pasture	SB10	2021-07-05	II	Trifolium pratense	Diptera	Syrphidae	Sphaerophoria	1
Sibiu Gusterita	Pasture	SB10	2021-07-05	II	Galium verum	Diptera	Syrphidae	Sphaerophoria	1
Sibiu Gusterita	Pasture	SB10	2021-07-05	II	Carduus nutans	Hymenoptera	Apidae	Apis	7
Sibiu Gusterita	Pasture	SB10	2021-07-05	II	Stellaria graminea	Diptera	Syrphidae	Sphaerophoria	4
Sibiu Gusterita	Pasture	SB10	2021-07-05	II	Trifolium pratense	Hymenoptera	Apidae	Eucera	1
Sibiu Gusterita	Pasture	SB10	2021-07-05	II	Achillea millefolium	Diptera	Syrphidae	Sphaerophoria	1
Sibiu Gusterita	Pasture	SB10	2021-07-07	III	Agrimonia eupatoria	Diptera	Syrphidae	Sphaerophoria	1
Sibiu Gusterita	Pasture	SB10	2021-07-07	III	Salvia pratensis	Hymenoptera	Apidae	Apis	2
Sibiu Gusterita	Pasture	SB10	2021-07-07	III	Carduus nutans	Hymenoptera	Apidae	Apis	9
Sibiu Gusterita	Pasture	SB10	2021-07-07	III	Carduus nutans	Diptera	Syrphidae	Sphaerophoria	1
Sibiu Gusterita	Pasture	SB10	2021-07-07	III	Carduus nutans	Hymenoptera	Apidae	Bombus	1
Sibiu Gusterita	Pasture	SB10	2021-07-07	III	Achillea millefolium	Diptera	Stratiomyidae	Stratiomys	1
Sibiu Gusterita	Pasture	SB10	2021-07-07	III	Carduus nutans	Hymenoptera	Apidae	Bombus	1
Sibiu Gusterita	Pasture	SB10	2021-07-07	III	Carduus nutans	Hymenoptera	Halictidae	Lasioglossum	1
Sibiu Gusterita	Pasture	SB10	2021-07-07	III	Cerastium holosteoides	Diptera	Syrphidae	Sphaerophoria	1
Sibiu Gusterita	Pasture	SB10	2021-07-07	IV	Dorycnium herbaceum	Diptera	Tachinidae	Mintho	1
