# Supplementary material for: Intensive pasture management alters the composition and structure of plant-pollinator interactions in Sibiu, Romania
Source: PeerJ journal article supplement (doi:10.7717/peerj.16900), 2024-02-29

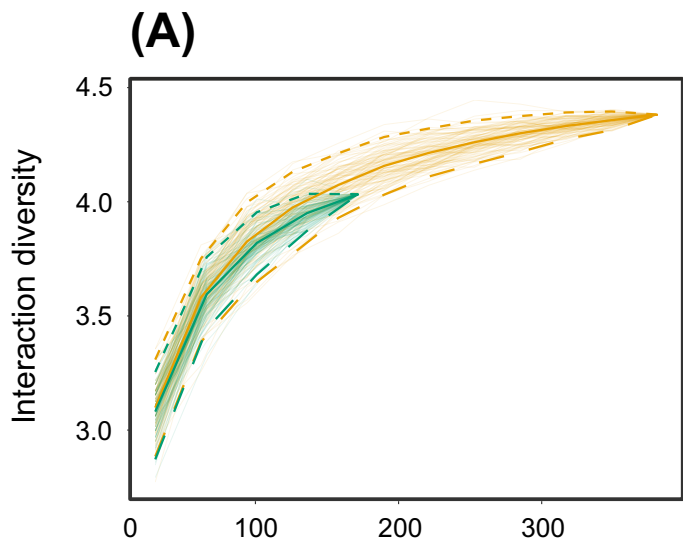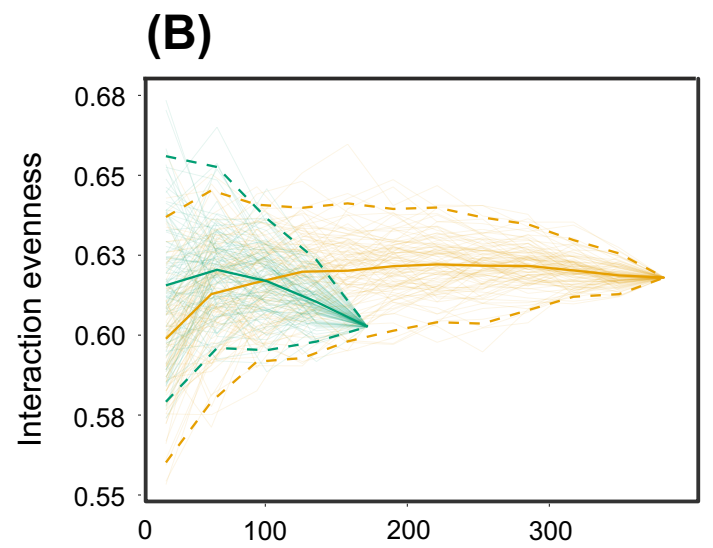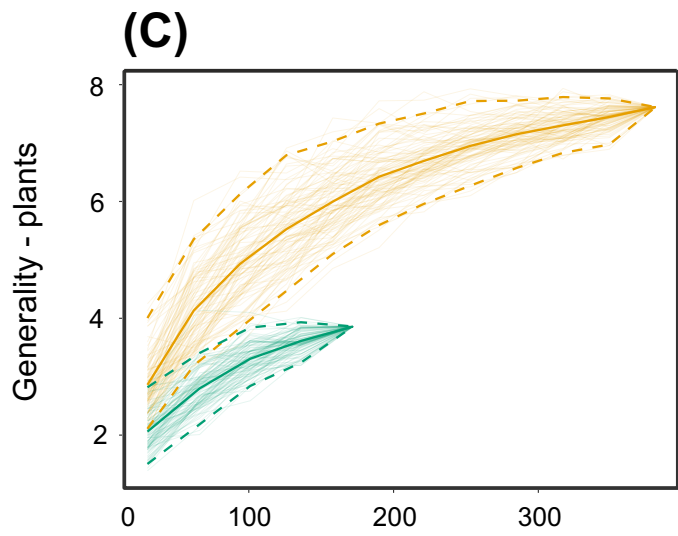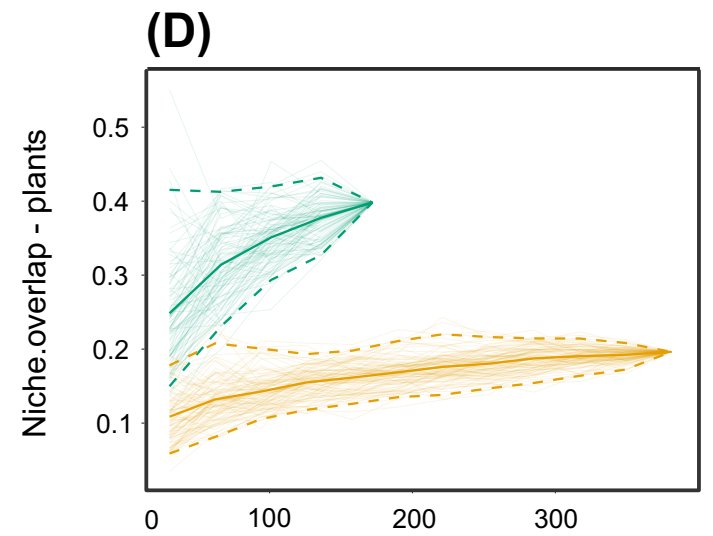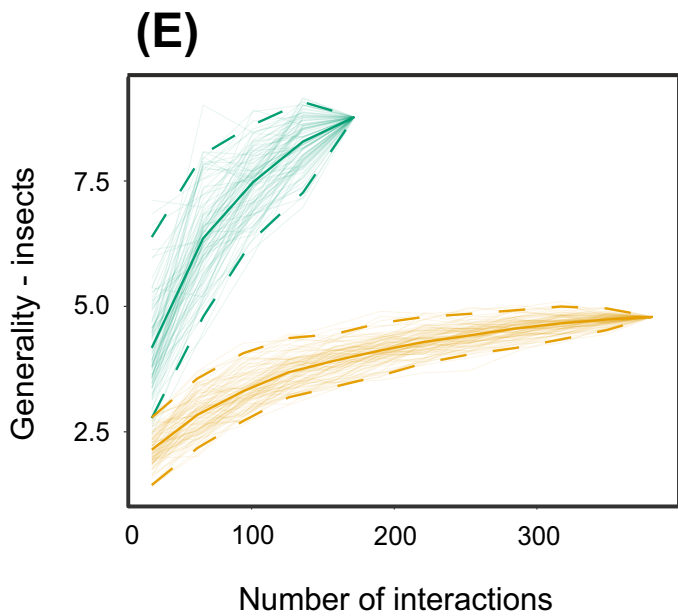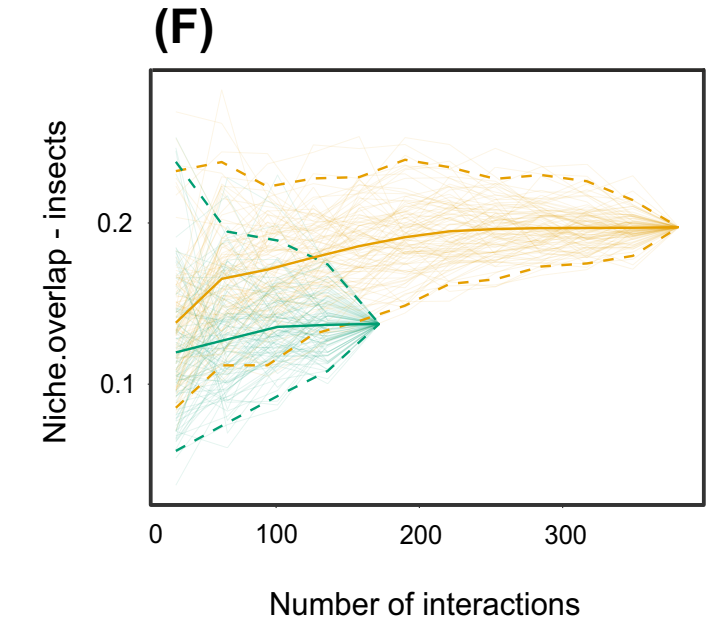

Supplement: Supplementary_Figure_1.pdf [file Supplementary_Figure_1.pdf]
